1 **Prevalence and factors associated with abdominal and total obesity among**  
2 **low-income urban population of Kiambu County, Kenya.**

3 Grace Wambura Mbuthia<sup>1</sup>, James Mwangi Ndithia<sup>2,3</sup>, James Odhiambo Oguta<sup>4,5</sup>, Catherine  
4 Akoth<sup>5</sup>, Karani Magutah<sup>6</sup>, Rosemary Kawira<sup>1</sup>, Caroline Nyariki<sup>1</sup>, Nickson Kimutai<sup>1</sup>, Agnes  
5 Kinyua<sup>7</sup>, Stephen T. McGarvey<sup>8</sup>

6 <sup>1</sup> School of Nursing, College of Health Sciences, Jomo Kenyatta University of Agriculture and  
7 Technology, P.O. Box 62000- 0200 Nairobi, Kenya.

8 <sup>2</sup>School of Public Health and Community Development, Maseno University, Kisumu, Kenya.

9 <sup>3</sup>World Health Organisation Somali, ATMIS protected area, Mogandishu, Somali.

10 <sup>4</sup>School of Health and Related Research, University of Sheffield, United Kingdom.

11 <sup>5</sup>African Network of Research Scientists, Nairobi, Kenya

12 <sup>6</sup>School of Medicine, College of Health Sciences, Moi University, P.O. Box 4606-30100, Eldoret,  
13 Kenya.

14 <sup>7</sup>School of Education, Kenyatta University, Kenya.

15 <sup>8</sup>International Health Institute, Department of Epidemiology, School of Public Health, and  
16 Department of Anthropology, Brown University, Providence, RI 02912, United States.

17  
18 Corresponding author: Grace Wambura Mbuthia Email: [grace.mbuthia@jkuat.ac.ke](mailto:grace.mbuthia@jkuat.ac.ke) P. O. Box  
19 62000- 0200 Nairobi, Kenya.

20

21

22

23

24

25

26

## 27 **Abstract**

28 Obesity is a major risk factor for most non-communicable diseases whose burden has been rising  
29 rapidly in low and middle-income countries. To develop public health interventions to address the  
30 increasing burden of overweight and obesity, estimates of the prevalence and associated factors  
31 are needed in specific populations. The study sought to determine the prevalence of total obesity  
32 and abdominal obesity among low-income adults in Kiambu County, Kenya. This community-  
33 based cross-sectional survey involved 1656 adults residing in Ruiru and Juja Sub-counties. Data  
34 were collected by trained community health volunteers (CHVs) in their respective sub-counties  
35 using an interviewer-administered questionnaire. The CHVs also took anthropometric  
36 measurements using relevant tools and standard procedures. Descriptive statistics were used to  
37 describe the participants' characteristics and proportions of adults with obesity. Multivariable  
38 logistic regression analyses were performed to assess the factors associated with obesity. The  
39 overall prevalence of obesity (body mass index [BMI]  $\geq 30$  kg/m<sup>2</sup>) was 28.8% (95% CI, 26.6%-  
40 30.9%), with a higher prevalence observed among women [33.6% (95% CI, 31.1%-36.2%)] than  
41 men [12.5% (95% CI, 9.6%-16.3%)]. A third (33.3%) of the participants were overweight ( $25 \leq$   
42 BMI  $< 30$  kg/m<sup>2</sup>). The prevalence of abdominal obesity as measured by waist-height-ratio (WHtR)  
43 was 79.8%, by waist circumference (WC) was 74.0% and by waist-hip-ratio (WHR) was 32%.  
44 Obesity was associated with female gender, increasing age, education level and monthly income.  
45 In conclusion, the prevalence of total obesity and abdominal obesity was high in the population.  
46 Public health strategies focusing on healthy diet, physical activity, weight reduction, and  
47 maintenance strategies are urgently needed among low-income adults.

48

49 **Keywords:** Obesity, Body Mass Index, Waist-Hip-Ratio, Waist-Height Ratio, Waist  
50 Circumference.

51

52

53

## 54 **Introduction**

55 The rising burden of non-communicable diseases (NCDs) as the major cause of morbidity and  
56 mortality globally is closely paralleled by and attributable to increasing levels of obesity [1]. In  
57 2016, more than 1.9 billion adults aged 18 years and older were overweight of whom more than  
58 650 million were obese. The worldwide prevalence of obesity nearly tripled between 1975 and  
59 2016[2]. Low and middle income countries (LMICs) bear the larger burden with nearly 2 billion  
60 people which accounts for 70% of the globally overweight or obese people residing in these  
61 countries [3]. The LMICs are undergoing a demographic transition including migration from rural  
62 to urban areas. Urban ways of life involve transitions to more physical inactivity, increased  
63 consumption of processed, nutrient dense foods, leading to increased risk of obesity and  
64 overweight. High overweight and obesity rates are strongly linked to high prevalence of non-  
65 communicable diseases (NCDs), which are now among the leading causes of death in many  
66 regions of the world[1, 3].

67 Obesity is a primary and fundamental risk factor for most cardiometabolic NCDs and contributes  
68 directly to the development of cardiovascular diseases (CVD) and CVD mortality independently  
69 of other cardiovascular risk factors [4-6]. Overweight and obesity increases the risk for type 2  
70 diabetes, high blood pressure (BP), dyslipidemia, certain cancers, musculoskeletal disorders as  
71 well as sleep disorders[4] and, more recently, COVID 19 morbidity and mortality [7]. A  
72 combination of decline in physical activity, diets becoming sweeter, saltier, and with higher  
73 saturated fat content all which trigger the onset of obesity and non-communicable diseases

74 The prevalence rates of obesity are increasing more rapidly in LMICs than they are in high income  
75 countries (HICs) [8]. In LMICs, the rate of overweight and obesity is higher among women than  
76 among men and in urban areas compared to rural areas [8]. Socio-economic status, age, marital  
77 status, physical inactivity and increased energy foods consumption are powerful predictors of  
78 overweight and obesity in sub-Saharan Africa [9]. In Kenya, previous studies documented high  
79 prevalence of obesity and associated adverse health outcomes [10-13]. The studies with country  
80 representative sample show a higher prevalence of overweight/ obesity among the urban  
81 population compared to the rural population in Kenya [10, 13].

82 Although BMI has widely been used to define severity of overweight and obesity across  
83 populations, measures of central adiposity, namely waist-to-height ratio (WHtR), waist

84 circumference (WC) and waist-to hip-ratio (WHR) have been adopted as more accurate predictors  
85 of cardiovascular risk and have replaced BMI in several definitions for clinical diagnosis of  
86 metabolic syndrome [14-16]. These measurements are easy and affordable to collect and therefore  
87 appropriate for low-resource settings. A recent study has shown abdominal obesity as determined  
88 by WC is a CVD risk marker that is independent of BMI[4]. A WHtR cutoff of 0.5 is recommended  
89 for both sexes and in different ethnic groups and is generally accepted as a universal cutoff for  
90 abdominal obesity in adults [14]. Thus, it could be used independently being superior to both BMI  
91 and WHR, or together with WHR that has cut offs of  $\geq 0.90$  (male) and  $\geq 0.85$  (female) [17].

92 The purpose of this report is to describe the estimated total obesity using BMI, and abdominal  
93 obesity using WC, WHtR and WHR and compare the estimates from each measurement in the  
94 same study population. Previous studies in this setting have used body mass index (BMI) as a  
95 measure of obesity at a time there is a shift to measures that focus more on abdominal obesity. The  
96 current study utilizes measures of central adiposity in addition to BMI to quantify obesity among  
97 urban low-income adults in Kenya.

98

## 99 **Materials and Methods**

100 **Study Design:** This was a community based cross-sectional survey.

101 **Study location:** The study was conducted at Juja and Ruiru sub-counties of Kiambu County, in  
102 Central Kenya.

103 **Study Population:** Adults aged 18 years or older, in the study location, willing to take part in the  
104 survey were involved.

105 **Inclusion Criteria and exclusion criteria:** All adults willing to provide informed consent for  
106 participation were included. However, persons with mental health disability and pregnant women  
107 were excluded. The pregnant women were excluded due to their physiological state that affects the  
108 WC measurement and BP variations during pregnancy.

109 **Sampling size and sampling:** Multistage sampling was used to select the participants in this study.  
110 Simple random sampling was used to select Juja and Ruiru sub-counties from the 12 sub-counties  
111 in Kiambu County. Out of the 13 administrative wards in Juja and Ruiru Sub-Counties four (30%  
112 of the wards) low income wards (as characterized by the housing characteristics) were purposively  
113 sampled. Each ward is divided into 5 Community Health Units (CHU) giving a total of 20 CHUs  
114 in the four wards. Systematic sampling was used to sample 100 households from each CHU giving  
115 a total of 2000 households. Data were collected from the household heads willing to participate in  
116 the study.

117 **Data Collection:** Trained CHVs collected data using interviewer-administered questionnaires  
118 adapted from the WHO stepwise questionnaire. Data collection took place from September-  
119 December 2022. Participants' anthropometric measurements including height, weight and WC  
120 were taken. Weight was measured to the nearest kilogram using a calibrated bathroom scale  
121 (CAMRY Mechanical scale, BR9012, Shanghai, China), with the subject in light clothing and  
122 without shoes. Height was measured using a plastic measuring tape scaled in centimeters by asking  
123 participant to stand barefoot beside a wall on an even floor and marking the highest point of the  
124 head using a pencil and taking the measurement of the wall up to the highest point of the head.  
125 Similarly, WC was taken by placing a flexible tape measure horizontally passing it along the  
126 umbilicus and recorded at the end of normal expiration. Hip circumference was taken by placing  
127 the tape measure parallel to the floor at the widest part of buttocks. Height, waist, and hip  
128 circumference were recorded to nearest centimeter.

129

130 **Data Analysis:** Descriptive statistics were used to describe the participants' characteristics, which  
131 were reported using frequencies, percentages, means and standard deviation. Obesity was  
132 categorized based on the World Health Organization's BMI categories; underweight (BMI <18.5  
133 kg/m<sup>2</sup>), normal weight (BMI 18.5-24.9 kg/m<sup>2</sup>), overweight (BMI 25-29.9 kg/m<sup>2</sup>) and obese (BMI  
134 ≥30 kg/m<sup>2</sup>) [18]. Significant WC was considered for measurements more than 90cm for males and  
135 more than 80cm in females [19] while a cut off of 0.5 for the WHtR in both sex was used to classify  
136 abdominal obesity [14]. For the WHR a cut offs of ≥ 0.90 (male) and ≥0.85 (female) [17] was  
137 considered obese. Bivariate and multivariable binary logistic regression analyses were performed  
138 to explore the relationship between obesity and various explanatory variables. We fitted separate  
139 models for obesity as defined by different metrics (BMI, WC, WHtR) . We reported unadjusted  
140 and adjusted odds ratios and evaluated statistical significance at P<0.05. All the statistical analyses  
141 were performed using Stata version 17.0 (Stata Corporation, College Station, TX).

142 **Ethical Considerations:** Ethical approval for the study was obtained from Jomo Kenyatta  
143 University of Agriculture and Technology (JKUAT) Institutional ethics committee approval  
144 number; JKU/IERC/02316/0652. Similarly, a research permit was obtained from the National  
145 Commission of Science, Technology and Innovation before commencement of the study; license  
146 number NACOSTI/P/22/19977. Participation in the study was voluntary and written informed  
147 consent was obtained from the participants before recruitment into the study. Confidentiality and  
148 anonymity of patients were guaranteed by excluding unique identifiers from the data collected  
149 from participants.

150

## 151 **Findings**

### 152 **Social demographic characteristics.**

153 Table 1 presents the characteristics of the sample. A total of 1,656 participants took part in the  
154 survey, indicating 83% response rate. The mean age of participants was 40.8 (SD: 14.3) years. The  
155 majority of the participants were female (77%), had secondary education (40.7%), were married  
156 (65.4%), self-employed (45.5%) and earned below Ksh5000 a month (41.7%).

157

158

159

160 **Table 1: Socio demographic characteristics**

| <b>Variables</b>                      | <b>Female<br/>n (%)</b> | <b>Male<br/>n (%)</b> | <b>Total<br/>n (%)</b> |
|---------------------------------------|-------------------------|-----------------------|------------------------|
| <b>Age in years (N=1656)</b>          | 40 (13.9)               | 43.3 (15.1)           | 40.8 (14.3)            |
| 18-30                                 | 362 (28.4)              | 85 (22.3)             | 447 (26.9)             |
| 31-40                                 | 395 (31)                | 105 (27.5)            | 500 (30.2)             |
| 41-50                                 | 253 (19.7)              | 75 (19.6)             | 328 (19.8)             |
| 51-60                                 | 145 (11.4)              | 65 (17.0)             | 210 (12.7)             |
| >60                                   | 119 (9.3)               | 52 (13.6)             | 171 (10.3)             |
| <b>Education level (N=1653)</b>       |                         |                       |                        |
| Never been to school                  | 52 (4.1)                | 9 (2.3)               | 61 (3.7)               |
| Primary                               | 455 (35.8)              | 104 (27.3)            | 559 (33.8)             |
| Secondary                             | 510 (40.1)              | 163 (42.9)            | 673 (40.7)             |
| Tertiary                              | 255 (20.1)              | 105 (27.5)            | 360 (21.7)             |
| <b>Marital status(N=1654)</b>         |                         |                       |                        |
| Single                                | 310 (24.4)              | 91 (23.9)             | 401 (24.3)             |
| Married                               | 811 (63.7)              | 274 (71.9)            | 1085 (65.4)            |
| Divorced/separated/widowed            | 152 (11.9)              | 16 (4.2)              | 168 (10.2)             |
| <b>Work status (N=1649)</b>           |                         |                       |                        |
| Employed                              | 148 (11.7)              | 93 (24.5)             | 241 (14.6)             |
| Self- employed                        | 581 (45.8)              | 168 (44.2)            | 749 (45.5)             |
| Homemaker                             | 242 (19.1)              | 8 (2.1)               | 250 (15.2)             |
| Retired                               | 53 (4.2)                | 22 (5.8)              | 75 (4.6)               |
| Student                               | 37 (2.9)                | 14 (3.7)              | 51 (3.1)               |
| Casual worker                         | 208 (16.4)              | 75 (19.7)             | 283 (17.2)             |
| <b>Income per month Ksh. (N=1550)</b> |                         |                       |                        |
| ≤5000                                 | 537 (44.6)              | 109 (31.5)            | 646 (41.7)             |
| 5001-10000                            | 412 (34.2)              | 102 (29.5)            | 514 (33.2)             |
| 10001-15,000                          | 112 (9.3)               | 47 (13.6)             | 159 (10.3)             |
| >15,000                               | 143 (11.88)             | 88 (25.4)             | 231 (14.9)             |
| <b>Alcohol Use (N=1648)</b>           |                         |                       |                        |
| Yes                                   | 145(11.4)               | 145(38.5)             | 290(17.6)              |
| No                                    | 1,126(88.6)             | 232(61.5)             | 1,358(82.4)            |
| <b>Tobacco Use(N=1,653)</b>           |                         |                       |                        |
| Yes                                   | 18(1.4)                 | 79(20.8)              | 97(5.9)                |
| No                                    | 1,255(98.6)             | 301(79.2)             | 1,556(94.1)            |

161

162

163

164

165 **Prevalence of total obesity and abdominal obesity.**

166 Overall, 62.1% of the participants were overweight/obese, while only a third (562, 34%) had  
 167 normal BMI. The prevalence of obesity was 28.8% (95%CI, 26.7%-30.9%). There was a higher  
 168 prevalence of obesity in women compared to men (33.6% [95% CI, 31.1%-36.2%] vs 12.5%[95%  
 169 CI, 9.6%-16.3%]. The prevalence of overweight was 33.3% and was higher in women (35% [95%  
 170 CI, 32.4%-37.7%]) than men (27.5% [95% CI, 23.2%-32.1%]). The WHtR estimated higher  
 171 prevalence of abdominal obesity compared to WC and WHR, at 79.8% (95%CI, 77.8%-81.6%).

172 **Table 2: Prevalence of total obesity and abdominal obesity**

| <b>Variables</b>                                    | <b>Females<br/>Mean (SD) or<br/>n (%)</b> | <b>Males<br/>Mean (SD) or<br/>n (%)</b> | <b>Total</b>         |
|-----------------------------------------------------|-------------------------------------------|-----------------------------------------|----------------------|
| Weight (Kg)                                         | 71.0 (14.7)                               | 68.5 (12.9)                             | 70.5 (14.3)          |
| Height (Meters)                                     | 1.59 (0.08)                               | 1.68 (0.10)                             | 1.61 (0.09)          |
| BMI (kg/m <sup>2</sup> )                            | 27.9 (5.8)                                | 24.4 (4.7)                              | 27.2 (5.8)           |
| Waist circumference(cm)                             | 93.4 (13.2)                               | 90.4 (11.6)                             | 92.7 (12.9)          |
| Hip circumference(cm)                               | 108.7 (11.9)                              | 100.9 (9.61)                            | 106.9 (11.9)         |
| <b>BMI categories (N=1652)</b>                      |                                           |                                         |                      |
| Normal (BMI 18.5- 24.9)                             | 358 (28.2)                                | 204 (53.4)                              | 562 (34.0)           |
| Underweight (BMI <18.5)                             | 40 (3.2)                                  | 25 (6.5)                                | 65 (3.9)             |
| Overweight (BMI 25-29.9)                            | 445 (35.0)                                | 105 (27.5)                              | 550 ( <b>33.3</b> )  |
| Obesity (BMI ≥30)                                   | 427 (33.6)                                | 48 (12.6)                               | 475 ( <b>28.8</b> )  |
| <b>Waist circumference (N=1651)</b>                 |                                           |                                         |                      |
| Not at risk (≤80cm for Female and ≤ 90 for male)    | 224 (17.7)                                | 206 (53.9)                              | 430 (26.0)           |
| At risk (WC>80cm for female and >90cm for males)    | 1045 (82.3)                               | 176 (46.1)                              | 1221 ( <b>74.0</b> ) |
| <b>WHR (N=1651)</b>                                 |                                           |                                         |                      |
| Not at risk WHR≤ 0.85 for Female and ≤ 0.9 for male | 916 (72.2)                                | 206 (53.9)                              | 1122 (68)            |
| At risk WHR>0.85 for female and >0.9                | 353 (27.8)                                | 176 (46.1)                              | 529 ( <b>32</b> )    |
| <b>WHtR (N=1656)</b>                                |                                           |                                         |                      |
| ≤0.5                                                | 209 (16.4)                                | 126 (33.0)                              | 335 (20.2)           |
| >0.5                                                | 1065 (83.6)                               | 256 (67.0)                              | 1321 ( <b>79.8</b> ) |

173 **Kg**-Kilogram; **Kg/m<sup>2</sup>** - Kilogram per metre squared; **cm** – Centimetres; **BMI**- Body mass index; **WHR**-Waist-Hip  
 174 ratio; **WHtR**-Waist-Height ratio; **WC**- Waist circumference

175

176 **Factors associated with Overweight/Obesity as measured by BMI**

177 Results of the unadjusted logistic regression model reveal that sex, age, marital status, work status,  
 178 tobacco and alcohol use were all significantly associated with overweight/obesity. In the adjusted  
 179 model, sex, increasing age, tertiary education and monthly income above Ksh.15,000 were  
 180 associated with overweight/obesity (Table 3). Males had 73% lower odds of being overweight and



181 obese (aOR=0.27; 95% CI 0.19-0.36) compared to the females. Participants in older age groups  
 182 had 2.1-3.4 times higher odds of overweight/obesity compared to those aged 18-30 years. Tertiary  
 183 education was associated with 2.2 times (aOR: 2.20, 95% CI 1.14-4.24) increased odds of  
 184 overweight/obesity compared to being illiterate. Similarly, participants earning more than  
 185 Ksh.15000 monthly had 1.6 times (aOR: 1.60, 95% CI 1.08-2.37) increased odds of being  
 186 overweight/obese.

187 **Table 3: Bivariate and Multivariable Logistic Regression model for factors associated with**  
 188 **overweight/obesity**

| Variables                    | cOR(95%CI)      | p-value | aOR(95 % CI)    | P-value |
|------------------------------|-----------------|---------|-----------------|---------|
| <b>Sex</b>                   |                 |         |                 |         |
| Female                       | Ref 1           |         | Ref             |         |
| Male                         | 0.30(0.24-0.39) | <0.001  | 0.27(0.19-0.36) | <0.001  |
| <b>Age</b>                   |                 |         |                 |         |
| 18-30                        | Ref             |         | Ref             |         |
| 31-40                        | 2.25(1.73-2.92) | <0.001  | 2.09(1.55-2.83) | <0.001  |
| 41-50                        | 2.58(1.91-3.47) | <0.001  | 2.71(1.90-3.86) | <0.001  |
| 51-60                        | 2.47(1.75-3.48) | <0.001  | 3.36(2.19-5.14) | <0.001  |
| >60                          | 2.13(1.48-3.07) | <0.001  | 2.85(1.74-4.67) | <0.001  |
| <b>Education level</b>       |                 |         |                 |         |
| Never been to school         | Ref             |         |                 |         |
| Primary                      | 1.33(0.78-2.27) | 0.298   | 1.51(0.82-2.77) | 0.186   |
| Secondary                    | 1.12(0.66-1.91) | 0.672   | 1.68(0.90-3.13) | 0.100   |
| Tertiary                     | 1.28(0.74-2.21) | 0.381   | 2.20(1.14-4.24) | 0.018   |
| <b>Marital status</b>        |                 |         |                 |         |
| Single                       | Ref             |         |                 |         |
| Married                      | 1.53(1.21-1.92) | <0.001  | 1.19(0.89-1.59) | 0.222   |
| Divorced/separated/windowed  | 1.97(1.35-2.90) | <0.001  | 0.99(0.63-1.57) | 0.998   |
| <b>Work status</b>           |                 |         |                 |         |
| Employed                     | Ref             |         |                 |         |
| Self-employed                | 1.48(1.11-2.00) | 0.008   | 1.28(0.91-1.82) | 0.157   |
| Homemaker                    | 1.45(1.00-2.08) | 0.045   | 1.27(0.80-2.02) | 0.307   |
| Retired                      | 1.39(0.81-2.37) | 0.233   | 1.15(0.58-2.29) | 0.688   |
| Student                      | 0.29(0.15-0.57) | <0.001  | 0.52(0.24-1.11) | 0.091   |
| Casual worker                | 1.22(0.86-1.74) | 0.253   | 1.31(0.87-1.98) | 0.196   |
| <b>Income per month Ksh.</b> |                 |         |                 |         |
| ≤5,000                       | Ref             |         |                 |         |
| 5,001-10,000                 | 1.24(0.97-1.56) | 0.083   | 1.19(0.89-1.58) | 0.235   |
| 10,001-15,000                | 1.26(0.87-1.80) | 0.212   | 1.45(0.95-2.20) | 0.085   |
| >15,000                      | 1.35(0.98-1.85) | 0.058   | 1.60(1.08-2.37) | 0.020   |
| <b>Alcohol Use</b>           |                 |         |                 |         |
| No                           | Ref             |         |                 |         |
| Yes                          | 0.76(0.59-0.98) | 0.035   | 1.02(0.74-1.40) | 0.891   |

---

**Tobacco Use**

|     |                 |        |                 |       |
|-----|-----------------|--------|-----------------|-------|
| No  | Ref             |        |                 |       |
| Yes | 0.40(0.27-0.61) | <0.001 | 0.64(0.36-1.01) | 0.057 |

---

189 **cOR** – crude odds ratio; **aOR** –adjusted odds ratio

190

191 **Factors associated with abdominal obesity as measured by WHtR**

192 The adjusted WHtR logistic regression model shows that sex, increasing age, education level and  
 193 tobacco use were associated with abdominal obesity (Table 4). Males had 64% reduced odds of  
 194 being overweight and obese (aOR=0.36; 95% CI 0.25-0.50) compared to the females. Higher age  
 195 groups are associated with 2.6-7.4 times increased odds of abdominal obesity. Smokers had 54%  
 196 reduced odds of abdominal obesity compared to non-smokers (aOR=0.46; 95% CI, 0.26-0.81).

197 **Table 4: Bivariate and Multivariable Logistic Regression model for factors associated**  
 198 **abdominal obesity by WHtR**

| <b>Variables</b>               | <b>cOR(95%CI)</b> | <b>p-value</b> | <b>aOR(95 % CI)</b> | <b>P-value</b> |
|--------------------------------|-------------------|----------------|---------------------|----------------|
| <b>Sex</b>                     |                   |                |                     |                |
| Female                         | Ref               |                |                     |                |
| Male                           | 0.39(0.31-0.52)   | <0.001         | 0.36(0.25-0.50)     | <0.001         |
| <b>Age</b>                     |                   |                |                     |                |
| 18-30                          | Ref               |                |                     |                |
| 31-40                          | 2.79(2.07-3.76)   | <0.001         | 2.58(1.83-3.64)     | <0.001         |
| 41-50                          | 4.98(3.34-7.42)   | <0.001         | 5.03(3.17-7.99)     | <0.001         |
| 51-60                          | 4.23(2.68-6.65)   | <0.001         | 5.80(3.27-10.27)    | <0.001         |
| >60                            | 4.75(2.84-7.95)   | <0.001         | 7.37(3.64-14.91)    | <0.001         |
| <b>Education level</b>         |                   |                |                     |                |
| Never been to school           | Ref               |                |                     |                |
| Primary                        | 1.37(0.72-2.64)   | 0.339          | 2.25(1.05-4.78)     | 0.035          |
| Secondary                      | 0.98(0.52-1.85)   | 0.945          | 2.36(1.10-5.05)     | 0.027          |
| Tertiary                       | 0.89(0.46-1.73)   | 0.745          | 2.49(1.23-5.59)     | 0.024          |
| <b>Marital status</b>          |                   |                |                     |                |
| Single                         | Ref               |                |                     |                |
| Married                        | 1.96(1.50-2.54)   | <0.001         | 1.26(0.91-1.77)     | 0.162          |
| Divorced/separated/window ed   | 1.98(1.79-4.93)   | <0.001         | 1.11(0.61-2.04)     | 0.733          |
| <b>Work status</b>             |                   |                |                     |                |
| Employed                       | Ref               |                |                     |                |
| Self- employed                 | 1.93(1.36-2.72)   | <0.001         | 1.42(0.94-2.12)     | 0.93           |
| Homemaker                      | 1.82(1.17-2.81)   | 0.007          | 1.34(0.77-2.35)     | 0.304          |
| Retired                        | 1.75(0.90-3.39)   | 0.097          | 0.72(0.30-1.71)     | 0.453          |
| Student                        | 0.30(0.16-0.56)   | <0.001         | 0.60(0.28-1.27)     | 0.182          |
| Casual worker                  | 1.21(0.81-1.79)   | 0.351          | 1.08(0.67-1.72)     | 0.752          |
| <b>Income per month (Ksh.)</b> |                   |                |                     |                |
| ≤5,000                         | Ref               |                |                     |                |
| 5,001-10,000                   | 1.07(0.80-1.42)   | 0.645          | 1.00(0.70-1.42)     | 0.989          |

|                    |                 |       |                 |       |
|--------------------|-----------------|-------|-----------------|-------|
| 10,001-15,000      | 1.13(0.72-1.75) | 0.599 | 1.25(0.75-2.09) | 0.398 |
| >15,000            | 1.12(0.77-1.63) | 0.564 | 1.13(0.70-1.83) | 0.611 |
| <b>Alcohol Use</b> |                 |       |                 |       |
| No                 | Ref             |       |                 |       |
| Yes                | 0.84(0.62-1.14) | 0.284 | 1.22(0.83-1.80) | 0.310 |
| <b>Tobacco Use</b> |                 |       |                 |       |
| No                 | Ref             |       |                 |       |
| Yes                | 0.47(0.30-0.72) | 0.001 | 0.46(0.26-0.81) | 0.008 |

199 cOR – crude odds ratio aOR –adjusted odds ratio

200 **Factors associated with abdominal obesity as measured by waist circumference**

201 Table 5 presents the results of the logistic regression analyses for the factors associated with  
 202 abdominal obesity as measured by WC. The results from the adjusted model reveal that sex, age,  
 203 education level, occupation, and tobacco are associated with abdominal obesity. Students had  
 204 reduced odds (aOR=0.37; 95% CI 0.17-0.81) of abdominal obesity compared to being employed.  
 205 Similarly, males and smokers had reduced odds of abdominal obesity compared to females and  
 206 non-smokers, respectively. The odds of abdominal obesity increased with age.

207 **Table 5: Bivariate and Multivariate Logistic Regression model for factors associated**  
 208 **abdominal obesity by Waist Circumference**

| Variables                   | cOR(95%CI)      | p-value | aOR(95 % CI)     | P-value |
|-----------------------------|-----------------|---------|------------------|---------|
| <b>Sex</b>                  |                 |         |                  |         |
| Female                      | Ref             |         |                  |         |
| Male                        | 0.18(0.14-0.23) | <0.001  | 0.13(0.09-0.17)  | <0.001  |
| <b>Age</b>                  |                 |         |                  |         |
| 18-30                       | Ref             |         |                  |         |
| 31-40                       | 2.52(1.89-3.33) | <0.001  | 2.62(1.86-3.71)  | <0.001  |
| 41-50                       | 3.67(2.59-5.18) | <0.001  | 4.92(3.17-7.66)  | <0.001  |
| 51-60                       | 3.73(2.47-5.60) | <0.001  | 6.99(4.04-12.10) | <0.001  |
| >60                         | 2.79(1.85-4.22) | <0.001  | 4.59(2.54- 8.31) | <0.001  |
| <b>Education level</b>      |                 |         |                  |         |
| Never been to school        | Ref             |         |                  |         |
| Primary                     | 1.32(0.73-2.39) | 0.353   | 1.91(0.94-3.87)  | 0.072   |
| Secondary                   | 1.02(0.57-1.83) | 0.946   | 2.16(1.05-4.42)  | 0.034   |
| Tertiary                    | 0.96(0.52-1.76) | 0.895   | 2.49(1.18-5.28)  | 0.017   |
| <b>Marital status</b>       |                 |         |                  |         |
| Single                      | Ref             |         |                  |         |
| Married                     | 1.95(1.52-2.50) | <0.001  | 1.32(0.95-1.84)  | 0.101   |
| Divorced/separated/windowed | 2.39(1.55-3.68) | <0.001  | 0.87(0.49-1.51)  | 0.624   |
| <b>Work status</b>          |                 |         |                  |         |
| Employed                    | Ref             |         |                  |         |
| Self- employed              | 2.03(1.47-2.79) | <0.001  | 1.39(0.93-2.07)  | 0.102   |
| Homemaker                   | 2.55(1.67-3.89) | <0.001  | 1.34(0.77-2.34)  | 0.290   |

|                               |                  |        |                 |       |
|-------------------------------|------------------|--------|-----------------|-------|
| Retired                       | 1.820(0.99-3.33) | 0.050  | 1.08(0.48-2.45) | 0.845 |
| Student                       | 0.27(0.14-0.51)  | <0.001 | 0.37(0.17-0.81) | 0.013 |
| Casual worker                 | 1.04(0.73-1.49)  | 0.823  | 0.82(0.52-1.30) | 0.397 |
| <b>Income per month (Ksh)</b> |                  |        |                 |       |
| ≤5000                         | Ref              |        |                 |       |
| 5001-10000                    | 1.32(0.73-2.39)  | 0.353  | 0.91(0.65-1.27) | 0.586 |
| 10001-15,000                  | 1.02(0.57-1.83)  | 0.946  | 0.97(0.60-1.59) | 0.917 |
| >15,000                       | 0.96(0.52-1.72)  | 0.895  | 1.08(0.68-1.72) | 0.730 |
| <b>Alcohol Use</b>            |                  |        |                 |       |
| No                            | Ref              |        | Ref             |       |
| Yes                           | 0.67(0.51-0.88)  | 0.005  | 1.34(0.93-1.94) | 0.117 |
| <b>Tobacco Use</b>            |                  |        |                 |       |
| No                            | Ref              |        | Ref             |       |
| Yes                           | 0.28(0.18-0.42)  | <0.001 | 0.51(0.29-0.87) | 0.014 |

209 **cOR** – crude odds ratio    **aOR** –adjusted odds ratio

210

## 211 Discussion

212 Our study found a prevalence of 62.1% for overweight/obesity, and specifically 33.3% of the  
 213 participants were overweight while 28.8% were obese by BMI. The prevalence was double that of  
 214 a study that utilized the 2015 World Health Organization Kenya STEPwise Survey data and  
 215 showed a national prevalence of overweight/obese of 31.1% [10]. The high prevalence compares  
 216 to a cross-sectional study among health workers in Kenya that showed a prevalence of 58.8% for  
 217 overweight/obesity[11]. Similarly, the findings compares with those of an urban population in a  
 218 study in Southwest Iran that reported the total prevalence of obesity and overweight as 26.5% and  
 219 38.7%, respectively[20].

220 The prevalence of abdominal obesity as measured by WHtR was 79.8%, WC was 74% and WHR  
 221 was 32%. Our findings are similar to those of a study done in Tunisia (Traissac et al., 2015) which  
 222 showed a much higher prevalence of abdominal than total obesity at 60% and 37% respectively in  
 223 the same study population. On the contrary, studies measuring abdominal obesity using WC only  
 224 in Southwest Iran and Southeast Ethiopia recorded a prevalence of 28.6% and 39.01%  
 225 respectively, much lower than the prevalence from our study (Ghaderian et al., 2019), (Tekalegn  
 226 et al., 2022). In a meta-analysis study in Ethiopia, the pooled prevalence of abdominal obesity was  
 227 37.7% (Tegegne et al., 2022). Our study measured abdominal (central) obesity using three  
 228 parameters; most studies reviewed had used WC.

229 Comparing overall overweight/obesity prevalence using BMI and abdominal/central obesity using  
 230 WHtR, WC and WHR, WHtR yielded the highest prevalence of obesity, followed by WC, then  
 231 BMI, with WHR recording the lowest. Our findings are consistent with those of a study in similar  
 232 settings involving adults from informal settlements in Kenya which documented a much higher  
 233 prevalence of abdominal obesity by WC of 52% compared to total obesity of 20% by BMI [21].  
 234 BMI is a commonly used measure of obesity in low income settings despite its limitation in

235 distinguishing between different body shapes/composition [22]. Previous studies among adults  
236 in urban Kenya[21] and urban Bissau in West Africa [23] have shown that individuals with normal  
237 weight may have an increased abdominal fat resulting in normal-weight central adiposity [21, 23]  
238 defined normal BMI (18.5 to 24.9 kg/m<sup>2</sup>) with abdominal obesity. Normal-weight central obesity  
239 is associated with higher risk of cardiovascular mortality compared to total obesity [24, 25].  
240 Further studies to indicate the magnitude and role of normal-weight abdominal obesity in  
241 predicting cardiovascular risks in the current setting are recommended. Our findings also point to  
242 need to incorporate the other parameters in addition to BMI for detection and subsequent  
243 prevention and management of obesity.

244 Male participants had reduced odds of total obesity and abdominal obesity by both WC and WHtR  
245 compared to females in this study. These findings compare to those from a study with a nationally  
246 representative sample from Kenya that showed higher prevalence's of overall and abdominal  
247 obesity in females than males[10]. Similarly, the finding is consistent with that of other studies in  
248 Ethiopia[26, 27], Malawi [28] and South Africa[29] that reported increased risk of obesity among  
249 women. Previous studies have attempted to attribute this finding to the increased pregnancies[30]  
250 and multiparous [31] nature of most women in low income settings. In addition, most men tend  
251 to engage in physically demanding and manual occupations that prevent weight gain and reduces  
252 their risk of obesity [32, 33]. Body image and societal beauty standards on women have pushed  
253 some women to desire to be heavier to feel more attractive[34]. A study in Ghana reported that 6%  
254 of women desired to be heavier, and tried to gain weight by consuming more calorie dense  
255 food[31]. Hormonal changes in women due to use of hormonal contraceptives also predispose  
256 them to obesity [35]. Moreover, postprandial lipemia, which reflects the body's metabolism of  
257 lipids, is reportedly more among women who use oral contraceptives[36], increasing their risk for  
258 obesity. These factors may have contributed the high rates of obesity among women in this study;  
259 however, future studies to assess the extent to which the factors contribute to obesity among low-  
260 income females in Kenya are needed.

261 Participants who attended school had increased odds of obesity compared to those who had never  
262 been to school. The odds of obesity increased with education level. Studies in low-income settings  
263 exposed to economic modernization have reported similar findings [35, 37]. However, in high-  
264 income countries, the educated are less likely to be obese[33]. Educational attainment raises the  
265 socioeconomic status of a person and with it come changes in working conditions and income  
266 levels. The educated are likely to adopt sedentary lifestyles and changes in dietary practices. The  
267 educated and wealthy tend to consume obesogenic foods that are usually processed, fat-saturated  
268 and sugary. These calorie-dense foods are mainly affordable to high income earners compared to  
269 the low-income households in Africa[37]. This may help explain the association between high-  
270 income level and obesity in this study.

271 This study found that increasing age was significantly associated with higher odds of total obesity,  
272 consistent with other studies in similar settings which have reported increased risk of obesity  
273 among older adults [11, 37, 38]. Ageing leads to body composition changes, increasing fat mass  
274 and decreasing muscle mass [39] and overall metabolism, that limit movement and activity,  
275 increasing risk of obesity.

276 This study found that higher monthly income was associated with increased odds of being obese.  
277 Similarly, studies conducted in Ethiopia revealed that respondents who were of a better economic  
278 status were more likely to be obese compared to those of low economic status [26, 40]. The  
279 increased risk could be attributed to access to sugary and fatty diet together with a sedentary  
280 lifestyle among people with better social-economic status. However, previous studies have  
281 documented contradictory observations on the relationship between obesity and income in high  
282 and low income countries. Studies show that obesity increases with income in low income  
283 countries[41, 42] while in high-income countries social economic status is inversely associated  
284 with obesity [42, 43]. The mechanisms behind these differences is not well understood with studies  
285 suggesting that a combination of several factors to include social, cultural, psychological and  
286 biological factors play a role [41]. Further studies to investigate the causal relationship between  
287 income and obesity are needed.

288 Our study found smokers had reduced odds of total obesity (at bivariate) and abdominal obesity  
289 compared to non-smokers. The finding is consistent with studies done in Kenya [13], Malawi[28],  
290 Burkina Faso [44] and South-Africa [45], that showed negative associations between BMI and  
291 smoking. Similarly, previous studies showed current smokers had lower waist circumference  
292 compared to nonsmokers [46, 47]. Two possible mechanism through which cigarette smoking can  
293 lead to reduced weight /adiposity include; the effect of nicotine, which increases energy  
294 expenditure in short-term and inhibit the expected compensatory increase in caloric intake, and  
295 smoking being a behavioral alternative to eating, resulting in decreased food intake [48, 49].

296 The strengths of the study are in the large community based sample and the use of more than one  
297 metric to estimate obesity in the same population. However, the study has some limitations because  
298 the data on behavioral factors were self-reported, collected retrospectively and thus liable to  
299 reporting, and recall bias. Similarly, the study utilized cross-sectional design and therefore a causal  
300 relationship between the outcome and predictor variables cannot be inferred. Nevertheless, we  
301 believe our estimates represent the epidemiology of abdominal and total obesity among the low-  
302 income adults in Kiambu County and provides basis for targeted interventions to address the high  
303 obesity among urban poor and future studies.

## 304 **Conclusion**

305 The prevalence of total obesity and abdominal obesity was high in the population. Public health  
306 strategies focusing on healthy diet, physical activity, weight reduction, and maintenance strategies  
307 are urgently needed among low-income adults.

## 308 **Acknowledgement**

309 Our special thanks go to the participants in this study for their invaluable contributions to this  
310 study. We thank the community health workers in Juja and Ruiru who conducted the data  
311 collection exercise. We also thank the Sub-county management teams and specifically the  
312 community strategy coordinators in the two sub-counties; Ms. Ann Wamaitha Mwangi and Ms.  
313 Njoki Mwaura, as well as the Community health assistants in the participating wards for their  
314 immense support during the data collection exercise.

315

## 316 **References.**

- 317 1. Dai H, Alsalhe TA, Chalghaf N, Riccò M, Bragazzi NL, Wu J. The global burden of disease  
318 attributable to high body mass index in 195 countries and territories, 1990-2017: An analysis of  
319 the Global Burden of Disease Study. *PLoS medicine*. 2020;17(7):e1003198. Epub 20200728. doi:  
320 10.1371/journal.pmed.1003198. PubMed PMID: 32722671; PubMed Central PMCID:  
321 PMCPMC7386577.
- 322 2. World Health Organization. Obesity and overweight Geneva2021 [cited 2023 28 May].  
323 Available from: <https://www.who.int/news-room/fact-sheets/detail/obesity-and-overweight>.
- 324 3. Shekar M, Popkin B. Obesity: health and economic consequences of an impending global  
325 challenge: World Bank Publications; 2020.
- 326 4. Powell-Wiley TM, Poirier P, Burke LE, Després J-P, Gordon-Larsen P, Lavie CJ, et al.  
327 Obesity and cardiovascular disease: a scientific statement from the American Heart Association.  
328 *Circulation*. 2021;143(21):e984-e1010.
- 329 5. Banjare J, Bhalerao S. Obesity associated noncommunicable disease burden. *International*  
330 *Journal of Health & Allied Sciences*. 2016;5(2):81-.
- 331 6. Koliaki C, Liatis S, Kokkinos A. Obesity and cardiovascular disease: revisiting an old  
332 relationship. *Metabolism*. 2019;92:98-107.
- 333 7. Yadav R, Aggarwal S, Singh A. SARS-CoV-2-host dynamics: Increased risk of adverse  
334 outcomes of COVID-19 in obesity. *Diabetes & Metabolic Syndrome: Clinical Research &*  
335 *Reviews*. 2020;14(5):1355-60.
- 336 8. Ford ND, Patel SA, Narayan KV. Obesity in low-and middle-income countries: burden,  
337 drivers, and emerging challenges. *Annual review of public health*. 2017;38:145-64.
- 338 9. Agyemang C, Boatemaa S, Frempong GA, de-Graft Aikins A. Obesity in sub-saharan  
339 Africa. Springer International Publishing Switzerland 2015; 2015.
- 340 10. Mkuu R, Barry A, Yonga G, Nafukho F, Wernz C, Gilreath T, et al. Prevalence and factors  
341 associated with overweight and obesity in Kenya. *Preventive Medicine Reports*. 2021;22:101340.
- 342 11. Ondicho Z, Omondi D, Onyango A. Prevalence and socio-demographic factors associated  
343 with overweight and obesity among healthcare workers in Kisumu East Sub-County, Kenya. 2016.
- 344 12. Mkuu RS, Epnere K, Chowdhury MAB. Peer reviewed: prevalence and predictors of  
345 overweight and obesity among Kenyan women. *Preventing chronic disease*. 2018;15.
- 346 13. Pengpid S, Peltzer K. The prevalence and associated factors of underweight and  
347 overweight/obesity among adults in Kenya: Evidence from a national cross-sectional community  
348 survey. *Pan African Medical Journal*. 2020;36(1).
- 349 14. Ashwell M, Gunn P, Gibson S. Waist-to-height ratio is a better screening tool than waist  
350 circumference and BMI for adult cardiometabolic risk factors: systematic review and  
351 meta-analysis. *Obesity reviews*. 2012;13(3):275-86.
- 352 15. Yoo EG. Waist-to-height ratio as a screening tool for obesity and cardiometabolic risk.  
353 *Korean J Pediatr*. 2016;59(11):425-31. Epub 20161118. doi: 10.3345/kjp.2016.59.11.425.  
354 PubMed PMID: 27895689; PubMed Central PMCID: PMCPMC5118501.
- 355 16. Lee CMY, Huxley RR, Wildman RP, Woodward M. Indices of abdominal obesity are  
356 better discriminators of cardiovascular risk factors than BMI: a meta-analysis. *Journal of Clinical*  
357 *Epidemiology*. 2008;61(7):646-53. doi: <https://doi.org/10.1016/j.jclinepi.2007.08.012>.
- 358 17. World Health Organization. Waist circumference and waist-hip ratio: report of a WHO  
359 expert consultation, Geneva, 8-11 December 2008. 2011.
- 360 18. World Health Organization. Obesity: preventing and managing the global epidemic. 2000.

- 361 19. Alberti G, Zimmet P, Shaw J, Grundy SM. The IDF consensus worldwide definition of the  
362 metabolic syndrome. Brussels: International Diabetes Federation. 2006;23(5):469-80.
- 363 20. Ghaderian SB, Yazdanpanah L, Shahbazian H, Sattari AR, Latifi SM, Sarvandian S.  
364 Prevalence and correlated factors for obesity, overweight and central obesity in southwest of Iran.  
365 Iranian journal of public health. 2019;48(7):1354.
- 366 21. Mohamed SF, Haregu TN, Khayeka-Wandabwa C, Muthuri SK, Kyobutungi C. Magnitude  
367 and predictors of normal-weight central obesity- the AWI-Gen study findings. Global health  
368 action. 2019;12(1):1685809. doi: 10.1080/16549716.2019.1685809. PubMed PMID: 31694493;  
369 PubMed Central PMCID: PMC6844381.
- 370 22. Frankenfield DC, Rowe WA, Cooney RN, Smith JS, Becker D. Limits of body mass index  
371 to detect obesity and predict body composition. Nutrition. 2001;17(1):26-30.
- 372 23. Turé R, Damasceno A, Djicó M, Lunet N. Prevalence of Underweight, Overweight and  
373 Obesity among Adults in Urban Bissau, Western Africa. Nutrients. 2021;13(12). Epub 20211123.  
374 doi: 10.3390/nu13124199. PubMed PMID: 34959751; PubMed Central PMCID:  
375 PMC68707413.
- 376 24. Sahakyan KR, Somers VK, Rodriguez-Escudero JP, Hodge DO, Carter RE, Sochor O, et  
377 al. Normal-Weight Central Obesity: Implications for Total and Cardiovascular Mortality. Annals  
378 of internal medicine. 2015;163(11):827-35. Epub 20151110. doi: 10.7326/m14-2525. PubMed  
379 PMID: 26551006; PubMed Central PMCID: PMC4995595.
- 380 25. Coutinho T, Goel K, Corrêa de Sá D, Carter RE, Hodge DO, Kragelund C, et al. Combining  
381 body mass index with measures of central obesity in the assessment of mortality in subjects with  
382 coronary disease: role of “normal weight central obesity”. Journal of the American College of  
383 Cardiology. 2013;61(5):553-60.
- 384 26. Tegegne KD, Wagaw GB, Gebeyehu NA, Yirdaw LT, Shewangashaw NE, Mekonen NA,  
385 et al. Prevalence of central obesity and associated factors in Ethiopia: A systematic review and  
386 meta-analysis. Frontiers in Endocrinology. 2022;13. doi: 10.3389/fendo.2022.983180.
- 387 27. Molla MD, Wolde HF, Atnafu A. Magnitude of Central Obesity and its Associated Factors  
388 Among Adults in Urban Areas of Northwest Ethiopia. Diabetes Metab Syndr Obes. 2020;13:4169-  
389 78. Epub 20201106. doi: 10.2147/dmso.S279837. PubMed PMID: 33192079; PubMed Central  
390 PMCID: PMC7654528.
- 391 28. Msyamboza KP, Kathyola D, Dzowela T. Anthropometric measurements and prevalence  
392 of underweight, overweight and obesity in adult Malawians: nationwide population based NCD  
393 STEPS survey. Pan African Medical Journal. 2013;15(1).
- 394 29. Case A, Menendez A. Sex differences in obesity rates in poor countries: Evidence from  
395 South Africa. Economics & Human Biology. 2009;7(3):271-82. doi:  
396 <https://doi.org/10.1016/j.ehb.2009.07.002>.
- 397 30. Chigbu C, Aja L. Obesity in pregnancy in southeast Nigeria. Annals of medical and health  
398 sciences research. 2011;1(2):135-40.
- 399 31. Benkeser R, Biritwum R, Hill A. Prevalence of overweight and obesity and perception of  
400 healthy and desirable body size in urban, Ghanaian women. Ghana medical journal.  
401 2012;46(2):66-75.
- 402 32. Pujilestari CU, Nyström L, Norberg M, Weinehall L, Hakimi M, Ng N. Socioeconomic  
403 inequality in abdominal obesity among older people in Purworejo District, Central Java, Indonesia  
404 – a decomposition analysis approach. International Journal for Equity in Health. 2017;16(1):214.  
405 doi: 10.1186/s12939-017-0708-6.



- 406 33. Wardle J, Waller J, Jarvis MJ. Sex differences in the association of socioeconomic status  
407 with obesity. *American journal of public health*. 2002;92(8):1299-304.
- 408 34. Pradeilles R, Holdsworth M, Olaitan O, Irache A, Osei-Kwasi HA, Ngandu CB, et al. Body  
409 size preferences for women and adolescent girls living in Africa: a mixed-methods systematic  
410 review. *Public health nutrition*. 2022;25(3):738-59.
- 411 35. Mangemba NT, San Sebastian M. Societal risk factors for overweight and obesity in  
412 women in Zimbabwe: a cross-sectional study. *BMC public health*. 2020;20(1):1-8.
- 413 36. Petto J, Vasques LMR, Pinheiro RL, Giesta BdA, Santos ACNd, Gomes Neto M, et al.  
414 Comparison of Postprandial Lipemia between Women who  
415 are on Oral Contraceptive Methods and Those who are not. *Arquivos Brasileiros de*  
416 *Cardiologia*. 2014;103.
- 417 37. Ajayi IO, Adebamowo C, Adami H-O, Dalal S, Diamond MB, Bajunirwe F, et al. Urban-  
418 rural and geographic differences in overweight and obesity in four sub-Saharan African adult  
419 populations: a multi-country cross-sectional study. *BMC Public Health*. 2016;16(1):1126. doi:  
420 10.1186/s12889-016-3789-z.
- 421 38. Chibuike Ogwuegbu C, Klaus GP, Uzochukwu UA, Ursula B. Prevalence and  
422 sociodemographic determinants of adult obesity: a large representative household survey in a  
423 resource-constrained African setting with double burden of undernutrition and overnutrition.  
424 *Journal of Epidemiology and Community Health*. 2018;72(8):702. doi: 10.1136/jech-2018-  
425 210573.
- 426 39. Sakuma K, Yamaguchi A. Sarcopenic obesity and endocrinal adaptation with age.  
427 *International journal of endocrinology*. 2013;2013.
- 428 40. Tekalegn Y, Solomon D, Sahiledengle B, Assefa T, Negash W, Tahir A, et al. Prevalence  
429 of central obesity and its associated risk factors among adults in Southeast Ethiopia: A community-  
430 based cross-sectional study. *PloS one*. 2022;17(8):e0265107.
- 431 41. Ameye H, Swinnen J. Obesity, income and gender: the changing global relationship.  
432 *Global Food Security*. 2019;23:267-81.
- 433 42. Dinsa GD, Goryakin Y, Fumagalli E, Suhrcke M. Obesity and socioeconomic status in  
434 developing countries: a systematic review. *Obesity reviews*. 2012;13(11):1067-79.
- 435 43. Kim TJ, von dem Knesebeck O. Income and obesity: what is the direction of the  
436 relationship? A systematic review and meta-analysis. *BMJ open*. 2018;8(1):e019862.
- 437 44. Kaboré S, Millogo T, Soubeiga JK, Lanou H, Bicaba B, Kouanda S. Prevalence and risk  
438 factors for overweight and obesity: a cross-sectional countrywide study in Burkina Faso. *BMJ*  
439 *Open*. 2020;10(11):e032953. doi: 10.1136/bmjopen-2019-032953.
- 440 45. Nglazi MD, Ataguba JE-O. Overweight and obesity in non-pregnant women of  
441 childbearing age in South Africa: subgroup regression analyses of survey data from 1998 to 2017.  
442 *BMC public health*. 2022;22(1):395. doi: 10.1186/s12889-022-12601-6.
- 443 46. Clair C, Chiolero A, Faeh D, Cornuz J, Marques-Vidal P, Paccaud F, et al. Dose-dependent  
444 positive association between cigarette smoking, abdominal obesity and body fat: cross-sectional  
445 data from a population-based survey. *BMC public health*. 2011;11:1-10.
- 446 47. Matsushita Y, Nakagawa T, Yamamoto S, Takahashi Y, Noda M, Mizoue T. Associations  
447 of smoking cessation with visceral fat area and prevalence of metabolic syndrome in men: the  
448 Hitachi health study. *Obesity*. 2011;19(3):647-51.
- 449 48. Audrain-McGovern J, Benowitz N. Cigarette smoking, nicotine, and body weight. *Clinical*  
450 *Pharmacology & Therapeutics*. 2011;90(1):164-8.

451 49. Chiolero A, Faeh D, Paccaud F, Cornuz J. Consequences of smoking for body weight, body  
452 fat distribution, and insulin resistance<sup>1</sup>. The American Journal of Clinical Nutrition.  
453 2008;87(4):801-9. doi: <https://doi.org/10.1093/ajcn/87.4.801>.

454
