1  
2  
3  
4  
5  
6  
7  
8  
9  
10  
11  
12  
13  
14  
15  
16  
17  
18  
19  
20  
21  
22  
23  
24  
25  
26

**Prevalence and factors associated with abdominal and total obesity among low-income urban population of Kiambu County, Kenya.**

Grace Wambura Mbuthia<sup>1</sup>, James Mwangi Ndithia<sup>2,3</sup>, James Odhiambo Oguta<sup>4,5</sup>, Catherine Akoth<sup>5</sup>, Karani Magutah<sup>6</sup>, Rosemary Kawira<sup>1</sup>, Caroline Nyariki<sup>1</sup>, Nickson Kimutai<sup>1</sup>, Agnes Kinyua<sup>7</sup>, Stephen T. McGarvey<sup>8</sup>

<sup>1</sup> School of Nursing, College of Health Sciences, Jomo Kenyatta University of Agriculture and Technology, P.O. Box 62000- 0200 Nairobi, Kenya.

<sup>2</sup>School of Public Health and Community Development, Maseno University, Kisumu, Kenya.

<sup>3</sup>World Health Organisation Somalia, ATMIS protected area, Mogandishu, Somalia.

<sup>4</sup>School of Health and Related Research, University of Sheffield, United Kingdom.

<sup>5</sup>African Network of Research Scientists, Nairobi, Kenya

<sup>6</sup>School of Medicine, College of Health Sciences, Moi University, P.O. Box 4606-30100, Eldoret, Kenya.

<sup>7</sup>School of Education, Kenyatta University, Kenya.

<sup>8</sup>International Health Institute, Department of Epidemiology, School of Public Health, and Department of Anthropology, Brown University, Providence, RI 02912, United States.

Corresponding author: Grace Wambura Mbuthia Email: [grace.mbuthia@jkuat.ac.ke](mailto:grace.mbuthia@jkuat.ac.ke) P. O. Box 62000- 0200 Nairobi, Kenya.

## 27 **Abstract**

28 Obesity is a major risk factor for most non-communicable diseases whose burden has been rising  
29 rapidly in low and middle-income countries. To develop public health interventions to address  
30 the increasing burden of overweight and obesity, estimates of the prevalence and associated  
31 factors are needed in specific populations. The study sought to determine the prevalence and  
32 factors associated with total obesity and abdominal obesity among low-income adults in Kiambu  
33 County, Kenya. This community-based cross-sectional survey involved 1656 adults residing in  
34 Kiambu County. Multistage sampling was used in the selection of participants. Data were  
35 collected by trained community health volunteers (CHVs) in their respective sub-counties using  
36 an interviewer-administered questionnaire. The CHVs also took anthropometric measurements  
37 using relevant tools and standard procedures. Descriptive statistics were used to describe the  
38 participants' characteristics and proportions of adults with obesity. Multivariable logistic  
39 regression analyses were performed to assess the factors associated with obesity. The mean age  
40 of participants was 40.8 ( $\pm 14.3$ ) years. The overall prevalence of total obesity (body mass index  
41 [BMI]  $\geq 30$  kg/m<sup>2</sup>) was 28.8% (95% CI, 26.6%-30.9%), with a higher prevalence observed  
42 among females [33.6% (95% CI, 31.1%-36.2%)] than males [12.5% (95% CI, 9.6%-16.3%)]. A  
43 third (33.3%) of the participants were overweight ( $25 \leq \text{BMI} < 30$  kg/m<sup>2</sup>). The prevalence of  
44 abdominal obesity as measured by waist-height-ratio (WHtR) was 79.8%, by waist  
45 circumference (WC) was 74.0%. Obesity/overweight by BMI was associated with female  
46 gender, increasing age, monthly income, while abdominal obesity by WHtR/WC was associated  
47 with female gender, increasing age and cigarette smoking. In conclusion, the prevalence of total  
48 obesity and abdominal obesity was high in the population. Public health strategies focusing on  
49 weight reduction and maintenance strategies are urgently needed among low-income adults.

50

51 **Keywords:** Obesity; abdominal obesity; low-income; factors; urban; Kenya.

52

53

54

## 55 **Introduction**

56 The rising burden of non-communicable diseases (NCDs) as the major cause of morbidity and  
57 mortality globally is closely paralleled by and attributable to increasing levels of obesity [1]. The  
58 worldwide prevalence of obesity nearly tripled between 1975 and 2016[2]. In 2016 over 2  
59 billion people were overweight or obese and 70% of these people resided in the low and middle  
60 income countries(LMICs) [3]. The LMICs are undergoing a demographic transition including  
61 migration from rural to urban areas. Urban ways of life involve transitions to more physical  
62 inactivity, increased consumption of processed, nutrient dense foods, leading to increased risk of  
63 obesity and overweight. The prevalence rates of obesity are increasing more rapidly in LMICs  
64 than they are in high income countries (HICs) [4]. In LMICs, the rate of overweight and obesity  
65 is higher among females than among males and in urban areas compared to rural areas [4].

66 Obesity is a primary and fundamental risk factor for most cardiometabolic NCDs and contributes  
67 directly to the development of cardiovascular diseases (CVD) and CVD mortality independently  
68 of other cardiovascular risk factors [5-7]. Overweight and obesity increases the risk for type 2  
69 diabetes, high blood pressure (BP), dyslipidemia, certain cancers, musculoskeletal disorders as  
70 well as sleep disorders[5] and, more recently, COVID 19 morbidity and mortality [8]. A  
71 combination of decline in physical activity, diets becoming sweeter, saltier, and with higher  
72 saturated fat content all which trigger the onset of obesity and non-communicable diseases

73 Socio-economic status, age, marital status, physical inactivity and increased energy foods  
74 consumption are powerful predictors of overweight and obesity in sub-Saharan Africa [9]. In  
75 Kenya, previous studies documented high prevalence of obesity and associated adverse health  
76 outcomes [10-13]. The studies with country representative sample show a higher prevalence of  
77 overweight/ obesity among the urban population compared to the rural population in Kenya [10,  
78 13].

79 Although BMI has widely been used to define severity of overweight and obesity across  
80 populations, measures of central adiposity, namely waist-to-height ratio (WHtR), waist  
81 circumference (WC) have been adopted as more accurate predictors of cardiovascular risk and  
82 have replaced BMI in several definitions for clinical diagnosis of metabolic syndrome [14-16].  
83 These measurements are easy and affordable to collect and therefore appropriate for low-

84 resource settings. A recent study has shown abdominal obesity as determined by WC is a CVD  
85 risk marker that is independent of BMI[5]. A WHtR cutoff of 0.5 is recommended for both sexes  
86 and in different ethnic groups and is generally accepted as a universal cutoff for abdominal  
87 obesity in adults [14]. Thus, it could be used independently being superior to both BMI and  
88 WHR, or together [17].

89 The purpose of this study is to describe the estimated total obesity using BMI, and abdominal  
90 obesity using WC and WHtR and the associated factors. The secondary objective will be to  
91 compare the obesity estimates from each measurement in the same study population. Previous  
92 studies in this setting [10-13] have used body mass index (BMI) as a measure of obesity at a time  
93 there is a shift to measures that focus more on abdominal obesity. The current study utilizes  
94 measures of central adiposity in addition to BMI to quantify obesity among urban low-income  
95 adults in Kenya.

96

## 97 **Materials and Methods**

98 **Study Design:** This was a community based cross-sectional survey. This study has been reported  
99 following internationally agreed recommendations for reporting observational studies[18].

100 **Study location:** The study was conducted in Kiambu County, in Central Kenya.

101 **Study Population:** Adults aged 18 years or older residing in the study area. The inclusion  
102 criteria was adult household heads aged 18 years or older, while persons with mental health  
103 disability and pregnant women were excluded. The pregnant women were excluded due to their  
104 physiological state that affects the WC measurement and BP variations during pregnancy.

105 **Sampling size and sampling:** Multistage sampling was used to select the participants in this  
106 study. Simple random sampling was used to select Juja and Ruiru sub-counties from the 12 sub-  
107 counties in Kiambu County. Out of the 13 administrative wards in Juja and Ruiru Sub-Counties  
108 four (30% of the wards) low income wards (as characterized by the housing characteristics) were  
109 purposively sampled. Each ward is divided into 5 Community Health Units (CHU) giving a total  
110 of 20 CHUs in the four wards. Systematic sampling was used to sample 100 households from  
111 each CHU giving a total of 2000 households. Data were collected from the household heads  
112 willing to participate in the study.

113 **Data Collection:** Trained CHVs collected data using interviewer-administered questionnaires  
114 adapted from the WHO stepwise questionnaire. Data collection took place from August- October  
115 2022. The data collected included social-demographic characteristics and behavioral factors such  
116 alcohol use and cigarette smoking. Participants' anthropometric measurements including height,  
117 weight and WC were taken. Weight was measured to the nearest kilogram using a calibrated  
118 bathroom scale (CAMRY Mechanical scale, BR9012, Shanghai, China), with the subject in light  
119 clothing and without shoes. Height was measured using a plastic measuring tape scaled in  
120 centimeters by asking participant to stand barefoot beside a wall on an even floor and marking  
121 the highest point of the head using a pencil and taking the measurement of the wall up to the  
122 highest point of the head. Similarly, WC was taken by placing a flexible tape measure  
123 horizontally passing it along the umbilicus and recorded at the end of normal expiration. Height  
124 and waist circumference were recorded to nearest centimeter.

125

126 **Data Analysis:** Descriptive statistics were used to describe the participants' characteristics,  
127 which were reported using frequencies, percentages, means and standard deviation. Obesity was  
128 categorized based on the World Health Organization's BMI categories; underweight (BMI <18.5  
129 kg/m<sup>2</sup>), normal weight (BMI 18.5-24.9 kg/m<sup>2</sup>), overweight (BMI 25-29.9 kg/m<sup>2</sup>) and obese  
130 (BMI ≥30 kg/m<sup>2</sup>) [19]. Significant WC was considered for measurements more than 90cm for  
131 males and more than 80cm in females [20] while a cut off of 0.5 for the WHtR in both gender  
132 was used to classify abdominal obesity [14]. Bivariate and multivariable binary logistic  
133 regression analyses were performed to explore the relationship between obesity and various  
134 explanatory variables. We fitted separate models for obesity as defined by different metrics  
135 (BMI, WC, WHtR) .We considered a p value of 0.25 for covariates to be included in the  
136 multivariable model. We reported unadjusted and adjusted odds ratios and evaluated statistical  
137 significance at P<0.05. All the statistical analyses were performed using Stata version 17.0 (Stata  
138 Corporation, College Station, TX).

139 **Ethical Considerations:** Ethical approval for the study was obtained from Jomo Kenyatta  
140 University of Agriculture and Technology (JKUAT) Institutional ethics committee approval  
141 number; JKU/IERC/02316/0652. Similarly, a research permit was obtained from the National  
142 Commission of Science, Technology and Innovation before commencement of the study; license  
143 number NACOSTI/P/22/19977. Participation in the study was voluntary and written informed  
144 consent was obtained from the participants before recruitment into the study. Confidentiality and  
145 anonymity of patients were guaranteed by excluding unique identifiers from the data collected  
146 from participants. We determined the WHtR by dividing the height by the waist circumference.

147

## 148 **Results**

### 149 **Social demographic characteristics.**

150 Table 1 presents the characteristics of the sample. A total of 1,656 participants took part in the  
151 survey, indicating 83% response rate. The mean age of participants was 40.8 (SD: 14.3) years.  
152 The majority of the participants were females (77%), had secondary education (40.7%), were  
153 married (65.4%), self-employed (45.5%) and earned below 40 USD a month (41.7%).

154

155 **Table 1: Socio demographic characteristics**

| <b>Variables</b>                       | <b>Females<br/>n (%)</b> | <b>Males<br/>n (%)</b> | <b>Total<br/>n (%)</b> |
|----------------------------------------|--------------------------|------------------------|------------------------|
| <b>Age in years (N=1656)</b>           |                          |                        |                        |
| 18-30                                  | 40 (13.9)                | 43.3 (15.1)            | 40.8 (14.3)            |
| 31-40                                  | 362 (28.4)               | 85 (22.3)              | 447 (26.9)             |
| 41-50                                  | 395 (31)                 | 105 (27.5)             | 500 (30.2)             |
| 51-60                                  | 253 (19.7)               | 75 (19.6)              | 328 (19.8)             |
| >60                                    | 145 (11.4)               | 65 (17.0)              | 210 (12.7)             |
|                                        | 119 (9.3)                | 52 (13.6)              | 171 (10.3)             |
| <b>Education level (N=1653)</b>        |                          |                        |                        |
| Never been to school                   | 52 (4.1)                 | 9 (2.3)                | 61 (3.7)               |
| Primary                                | 455 (35.8)               | 104 (27.3)             | 559 (33.8)             |
| Secondary                              | 510 (40.1)               | 163 (42.9)             | 673 (40.7)             |
| Tertiary                               | 255 (20.1)               | 105 (27.5)             | 360 (21.7)             |
| <b>Marital status(N=1654)</b>          |                          |                        |                        |
| Single                                 | 310 (24.4)               | 91 (23.9)              | 401 (24.3)             |
| Married                                | 811 (63.7)               | 274 (71.9)             | 1085 (65.4)            |
| Divorced/separated/widowed             | 152 (11.9)               | 16 (4.2)               | 168 (10.2)             |
| <b>Work status (N=1649)</b>            |                          |                        |                        |
| Employed                               | 148 (11.7)               | 93 (24.5)              | 241 (14.6)             |
| Self- employed                         | 581 (45.8)               | 168 (44.2)             | 749 (45.5)             |
| Homemaker                              | 242 (19.1)               | 8 (2.1)                | 250 (15.2)             |
| Retired                                | 53 (4.2)                 | 22 (5.8)               | 75 (4.6)               |
| Student                                | 37 (2.9)                 | 14 (3.7)               | 51 (3.1)               |
| Casual worker                          | 208 (16.4)               | 75 (19.7)              | 283 (17.2)             |
| <b>Income per month (USD) (N=1550)</b> |                          |                        |                        |
| ≤40                                    | 537 (44.6)               | 109 (31.5)             | 646 (41.7)             |
| 40-80                                  | 412 (34.2)               | 102 (29.5)             | 514 (33.2)             |
| 81-120                                 | 112 (9.3)                | 47 (13.6)              | 159 (10.3)             |
| >120                                   | 143 (11.88)              | 88 (25.4)              | 231 (14.9)             |
| <b>Alcohol Use (N=1648)</b>            |                          |                        |                        |
| Yes                                    | 145(11.4)                | 145(38.5)              | 290(17.6)              |
| No                                     | 1,126(88.6)              | 232(61.5)              | 1,358(82.4)            |
| <b>Cigarette smoking(N=1,653)</b>      |                          |                        |                        |
| Yes                                    | 18(1.4)                  | 79(20.8)               | 97(5.9)                |
| No                                     | 1,255(98.6)              | 301(79.2)              | 1,556(94.1)            |

156

157

158 **Prevalence of total obesity and abdominal obesity.**

159 Overall, 62.1% of the participants were overweight/obese, while only a third (562, 34%) had  
 160 normal BMI. The prevalence of obesity was 28.8% (95%CI, 26.7%-30.9%). There was a higher

161 prevalence of obesity in females compared to males (33. 6% [95% CI, 31.1%-36.2%] vs  
 162 12.5%[95% CI, 9.6%-16.3%]. The prevalence of overweight was 33.3% and was higher in  
 163 females (35% [95% CI, 32.4%-37.7%]) than men (27.5% [95% CI, 23.2%-32.1%]). The WHtR  
 164 estimated higher prevalence of abdominal obesity compared to WC, at 79.8% (95%CI, 77.8%-  
 165 81.6%).

166 **Table 2: Prevalence of total obesity and abdominal obesity**

| <b>Variables</b>                                  | <b>Females<br/>Mean (SD) or<br/>n (%)</b> | <b>Males<br/>Mean (SD) or<br/>n (%)</b> | <b>Total</b>         |
|---------------------------------------------------|-------------------------------------------|-----------------------------------------|----------------------|
| Weight (Kg)                                       | 71.0 (14.7)                               | 68.5 (12.9)                             | 70.5 (14.3)          |
| Height (Meters)                                   | 1.59 (0.08)                               | 1.68 (0.10)                             | 1.61 (0.09)          |
| BMI (kg/m <sup>2</sup> )                          | 27.9 (5.8)                                | 24.4 (4.7)                              | 27.2 (5.8)           |
| Waist circumference(cm)                           | 93.4 (13.2)                               | 90.4 (11.6)                             | 92.7 (12.9)          |
| <b>BMI categories (N=1652)</b>                    |                                           |                                         |                      |
| Normal (BMI 18.5- 24.9)                           | 358 (28.2)                                | 204 (53.4)                              | 562 (34.0)           |
| Underweight (BMI <18.5)                           | 40 (3.2)                                  | 25 (6.5)                                | 65 (3.9)             |
| Overweight (BMI 25-29.9)                          | 445 (35.0)                                | 105 (27.5)                              | 550 ( <b>33.3</b> )  |
| Obesity (BMI ≥30)                                 | 427 (33.6)                                | 48 (12.6)                               | 475 ( <b>28.8</b> )  |
| <b>Waist circumference (N=1651)</b>               |                                           |                                         |                      |
| Not at risk (≤80cm for Females and ≤ 90 for male) | 224 (17.7)                                | 206 (53.9)                              | 430 (26.0)           |
| At risk (WC>80cm for females and >90cm for males) | 1045 (82.3)                               | 176 (46.1)                              | 1221 ( <b>74.0</b> ) |
| <b>WHtR (N=1656)</b>                              |                                           |                                         |                      |
| ≤0.5                                              | 209 (16.4)                                | 126 (33.0)                              | 335 (20.2)           |
| >0.5                                              | 1065 (83.6)                               | 256 (67.0)                              | 1321 ( <b>79.8</b> ) |

167 **Kg**-Kilogram; **Kg/m<sup>2</sup>** - Kilogram per metre squared; **cm** – Centimetres; **BMI**- Body mass index; ratio; **WHtR**-  
 168 Waist-Height ratio; **WC**- Waist circumference

169

170 **Factors associated with Overweight/Obesity as measured by BMI**

171 Results of the unadjusted logistic regression model reveal that gender, age, marital status, work  
 172 status, cigarette smoking and alcohol use were all significantly associated with  
 173 overweight/obesity. In the adjusted model, gender, increasing age and monthly income above 80  
 174 USD were associated with overweight/obesity (Table 3). Males had 73% lower odds of being  
 175 overweight and obese (aOR=0.27; 95% CI 0.20-0.36) compared to the females. Participants in  
 176 older age groups had 2-3 times higher odds of overweight/obesity compared to those aged 18-30



177 years. Similarly, participants earning more than 80 USD monthly increased odds of being  
 178 overweight/obese.

179 **Table 3: Bivariate and Multivariable Logistic Regression model for factors associated with**  
 180 **overweight/obesity**

| <b>Variables</b>              | <b>cOR(95%CI)</b> | <b>p-value</b> | <b>aOR(95 % CI)</b> | <b>P-value</b> |
|-------------------------------|-------------------|----------------|---------------------|----------------|
| <b>Gender</b>                 |                   |                |                     |                |
| Females                       | Ref 1             |                | Ref                 |                |
| Males                         | 0.30(0.24-0.39)   | <0.001         | 0.27(0.20-0.36)     | <0.001         |
| <b>Age</b>                    |                   |                |                     |                |
| 18-30                         | Ref               |                | Ref                 |                |
| 31-40                         | 2.25(1.73-2.92)   | <0.001         | 2.03(1.51-2.73)     | <0.001         |
| 41-50                         | 2.58(1.91-3.47)   | <0.001         | 2.55(1.90-3.86)     | <0.001         |
| 51-60                         | 2.47(1.75-3.48)   | <0.001         | 3.08(2.03-4.67)     | <0.001         |
| >60                           | 2.13(1.48-3.07)   | <0.001         | 2.41(1.50-3.87)     | <0.001         |
| <b>Education level</b>        |                   |                |                     |                |
| Never been to school          | Ref               |                |                     |                |
| Primary                       | 1.33(0.78-2.27)   | 0.298          |                     |                |
| Secondary                     | 1.12(0.66-1.91)   | 0.672          |                     |                |
| Tertiary                      | 1.28(0.74-2.21)   | 0.381          |                     |                |
| <b>Marital status</b>         |                   |                |                     |                |
| Single                        | Ref               |                |                     |                |
| Married                       | 1.53(1.21-1.92)   |                | 1.21(0.91-1.61)     | 0.185          |
| Divorced/separated/windowed   | 1.97(1.35-2.90)   | <0.001         | 0.97(0.61-1.51)     | 0.882          |
| <b>Work status</b>            |                   |                |                     |                |
| Employed                      | Ref               |                |                     |                |
| Self- employed                | 1.48(1.11-2.00)   | 0.008          | 1.24(0.88-1.75)     | 0.219          |
| Homemaker                     | 1.45(1.00-2.08)   | 0.045          | 1.18(0.75-1.88)     | 0.460          |
| Retired                       | 1.39(0.81-2.37)   | 0.233          | 1.11(0.55-2.20)     | 0.767          |
| Student                       | 0.29(0.15-0.57)   | <0.001         | 0.57(0.27-1.21)     | 0.148          |
| Casual worker                 | 1.22(0.86-1.74)   | 0.253          | 1.21(0.80-1.82)     | 0.352          |
| <b>Income per month (USD)</b> |                   |                |                     |                |
| ≤40                           | Ref               |                |                     |                |
| 40-80                         | 1.24(0.97-1.56)   | 0.083          | 1.21(0.91-1.61)     | 0.177          |
| 81-120                        | 1.26(0.87-1.80)   | 0.212          | 1.51(0.99-2.28)     | 0.053          |
| >120                          | 1.35(0.98-1.85)   | 0.058          | 1.76(1.19-2.58)     | 0.004          |
| <b>Alcohol Use</b>            |                   |                |                     |                |
| No                            | Ref               |                |                     |                |
| Yes                           | 0.76(0.59-0.98)   | 0.035          | 1.04(0.76-1.43)     | 0.797          |
| <b>Cigarette smoking</b>      |                   |                |                     |                |
| No                            | Ref               |                |                     |                |
| Yes                           | 0.40(0.27-0.61)   | <0.001         | 0.65 (0.39-1.08)    | 0.101          |

181 **cOR** – crude odds ratio; **aOR** –adjusted odds ratio

182

183 **Factors associated with abdominal obesity as measured by WHtR**

184 The adjusted WHtR logistic regression model shows that gender, increasing age, education level  
 185 and cigarette smoking were associated with abdominal obesity (Table 4). Males had 65%  
 186 reduced odds of being overweight and obese (aOR=0.35; 95% CI 0.25-0.48) compared to the  
 187 females. Higher age groups are associated with 2.8-6.8 times increased odds of abdominal  
 188 obesity. Smokers had 48% reduced odds of abdominal obesity compared to non-smokers  
 189 (aOR=0.52; 95% CI, 0.30-0.89).

190 **Table 4: Bivariate and Multivariable Logistic Regression model for factors associated**  
 191 **abdominal obesity by WHtR**

| Variables                     | cOR(95%CI)      | p-value | aOR(95 % CI)     | P-value |
|-------------------------------|-----------------|---------|------------------|---------|
| <b>Gender</b>                 |                 |         |                  |         |
| Females                       | Ref             |         |                  |         |
| Males                         | 0.39(0.31-0.52) | <0.001  | 0.35(0.25-0.48)  | <0.001  |
| <b>Age</b>                    |                 |         |                  |         |
| 18-30                         | Ref             |         |                  |         |
| 31-40                         | 2.79(2.07-3.76) | <0.001  | 2.81(2.02-3.90)  | <0.001  |
| 41-50                         | 4.98(3.34-7.42) | <0.001  | 5.26(3.38-8.19)  | <0.001  |
| 51-60                         | 4.23(2.68-6.65) | <0.001  | 4.99(3.00-8.27)  | <0.001  |
| >60                           | 4.75(2.84-7.95) | <0.001  | 6.87(3.56-13.23) | <0.001  |
| <b>Education level</b>        |                 |         |                  |         |
| Never been to school          | Ref             |         |                  |         |
| Primary                       | 1.37(0.72-2.64) | 0.339   |                  |         |
| Secondary                     | 0.98(0.52-1.85) | 0.945   |                  |         |
| Tertiary                      | 0.89(0.46-1.73) | 0.745   |                  |         |
| <b>Marital status</b>         |                 |         |                  |         |
| Single                        | Ref             |         |                  |         |
| Married                       | 1.96(1.50-2.54) | <0.001  | 1.22(0.88-1.67)  | 0.225   |
| Divorced/separated/windowed   | 1.98(1.79-4.93) | <0.001  | 0.97(0.54-1.72)  | 0.917   |
| <b>Work status</b>            |                 |         |                  |         |
| Employed                      | Ref             |         |                  |         |
| Self- employed                | 1.93(1.36-2.72) | <0.001  | 1.33(0.94-2.12)  | 0.133   |
| Homemaker                     | 1.82(1.17-2.81) | 0.007   | 1.31(0.77-2.35)  | 0.279   |
| Retired                       | 1.75(0.90-3.39) | 0.097   | 0.64(0.30-1.71)  | 0.292   |
| Student                       | 0.30(0.16-0.56) | <0.001  | 0.59(0.28-1.27)  | 0.129   |
| Casual worker                 | 1.21(0.81-1.79) | 0.351   | 1.02(0.67-1.57)  | 0.909   |
| <b>Income per month (USD)</b> |                 |         |                  |         |
| ≤40                           | Ref             |         |                  |         |
| 40-80                         | 1.07(0.80-1.42) | 0.645   |                  |         |
| 81-120                        | 1.13(0.72-1.75) | 0.599   |                  |         |
| >120                          | 1.12(0.77-1.63) | 0.564   |                  |         |

**Alcohol Use**

|     |                 |       |                 |       |
|-----|-----------------|-------|-----------------|-------|
| No  | Ref             |       |                 |       |
| Yes | 0.84(0.62-1.14) | 0.284 | 1.26(0.87-1.83) | 0.216 |

**Cigarette smoking**

|     |                 |       |                 |       |
|-----|-----------------|-------|-----------------|-------|
| No  | Ref             |       |                 |       |
| Yes | 0.47(0.30-0.72) | 0.001 | 0.52(0.30-0.89) | 0.018 |

192 cOR – crude odds ratio aOR –adjusted odds ratio

193 **Factors associated with abdominal obesity as measured by waist circumference**

194 Table 5 presents the results of the logistic regression analyses for the factors associated with  
 195 abdominal obesity as measured by WC. The results from the adjusted model reveal that gender,  
 196 age, occupation, and cigarette smoking are associated with abdominal obesity. Students had  
 197 reduced odds (aOR=0.41; 95% CI 0.17-0.81) of abdominal obesity compared to being employed.  
 198 Similarly, males and smokers had reduced odds of abdominal obesity compared to females and  
 199 non-smokers, respectively. The odds of abdominal obesity increased with age.

200 **Table 5: Bivariate and Multivariate Logistic Regression model for factors associated**  
 201 **abdominal obesity by Waist Circumference**

| Variables                   | cOR(95%CI)      | p-value | aOR(95 % CI)     | P-value |
|-----------------------------|-----------------|---------|------------------|---------|
| <b>Gender</b>               |                 |         |                  |         |
| Females                     | Ref             |         |                  |         |
| Males                       | 0.18(0.14-0.23) | <0.001  | 0.13(0.09-0.18)  | <0.001  |
| <b>Age</b>                  |                 |         |                  |         |
| 18-30                       | Ref             |         |                  |         |
| 31-40                       | 2.52(1.89-3.33) | <0.001  | 2.84(2.04-3.96)  | <0.001  |
| 41-50                       | 3.67(2.59-5.18) | <0.001  | 4.90(3.22-7.44)  | <0.001  |
| 51-60                       | 3.73(2.47-5.60) | <0.001  | 5.69(3.49-9.29)  | <0.001  |
| >60                         | 2.79(1.85-4.22) | <0.001  | 4.58(2.62- 7.98) | <0.001  |
| <b>Education level</b>      |                 |         |                  |         |
| Never been to school        | Ref             |         |                  |         |
| Primary                     | 1.32(0.73-2.39) | 0.353   |                  |         |
| Secondary                   | 1.02(0.57-1.83) | 0.946   |                  |         |
| Tertiary                    | 0.96(0.52-1.76) | 0.895   |                  |         |
| <b>Marital status</b>       |                 |         |                  |         |
| Single                      | Ref             |         |                  |         |
| Married                     | 1.95(1.52-2.50) | <0.001  | 1.31(0.95-1.81)  | 0.093   |
| Divorced/separated/windowed | 2.39(1.55-3.68) | <0.001  | 0.74(0.43-1.25)  | 0.261   |
| <b>Work status</b>          |                 |         |                  |         |
| Employed                    | Ref             |         |                  |         |
| Self- employed              | 2.03(1.47-2.79) | <0.001  | 1.31(0.91-1.89)  | 0.149   |
| Homemaker                   | 2.55(1.67-3.89) | <0.001  | 1.34(0.82-2.18)  | 0.232   |

|                               |                 |        |                 |       |
|-------------------------------|-----------------|--------|-----------------|-------|
| Retired                       | 1.82(0.99-3.33) | 0.050  | 1.02(0.48-2.20) | 0.954 |
| Student                       | 0.27(0.14-0.51) | <0.001 | 0.41(0.19-0.85) | 0.016 |
| Casual worker                 | 1.04(0.73-1.49) | 0.823  | 0.76(0.50-1.15) | 0.197 |
| <b>Income per month (USD)</b> |                 |        |                 |       |
| ≤40                           | Ref             |        |                 |       |
| 40-80                         | 1.32(0.73-2.39) | 0.353  |                 |       |
| 81-120                        | 1.02(0.57-1.83) | 0.946  |                 |       |
| >120                          | 0.96(0.52-1.72) | 0.895  |                 |       |
| <b>Alcohol Use</b>            |                 |        |                 |       |
| No                            | Ref             |        | Ref             |       |
| Yes                           | 0.67(0.51-0.88) | 0.005  | 1.39(0.98-1.9)  | 0.065 |
| <b>Cigarette smoking</b>      |                 |        |                 |       |
| No                            | Ref             |        | Ref             |       |
| Yes                           | 0.28(0.18-0.42) | <0.001 | 0.48(0.29-0.82) | 0.007 |

202 **cOR** – crude odds ratio    **aOR** –adjusted odds ratio

203

## 204 Discussion

205 Our study found a prevalence of 62.1% for overweight/obesity, and specifically 33.3% of the  
 206 participants were overweight while 28.8% were obese by BMI. The prevalence was double that  
 207 of a study that utilized the 2015 World Health Organization Kenya STEPwise Survey data and  
 208 showed a national prevalence of overweight/obese of 31.1% [10]. Similarly, in their study,  
 209 Pengpid & Peltzer reported a lower prevalence of overweight/obese of 28% in Kenya using a  
 210 nationally representative community based sample [13]. The difference in the prevalence in the  
 211 current study and the two study may be because the two previous studies used data collected in  
 212 2015 that included both rural and urban population. The high prevalence in this study compares  
 213 to a cross-sectional study among health workers in Kenya that showed a prevalence of 58.8% for  
 214 overweight/obesity[11]. The prevalence is lower than that of an urban population in a study done  
 215 in Nigeria that reported a prevalence of obesity and overweight as 21% and 53.3%,  
 216 respectively[21]. However, the prevalence was higher than that of a study among urban  
 217 population in Norwest Ethiopia that showed a prevalence of overweight and obesity of 32% and  
 218 16% respectively[22].

219 The prevalence of abdominal obesity as measured by WHtR was 79.8% and WC was 74%. Our  
 220 findings are similar to those of a study done in Tunisia (Traissac et al., 2015) which showed a  
 221 much higher prevalence of abdominal than total obesity at 60% and 37% respectively in the

222 same study population. On the contrary, studies measuring abdominal obesity using WC only in  
223 Southwest Iran and Southeast Ethiopia recorded a prevalence of 28.6% and 39.01% respectively,  
224 much lower than the prevalence from our study (Ghaderian et al., 2019), (Tekalegn et al., 2022).  
225 In a meta-analysis study in Ethiopia, the pooled prevalence of abdominal obesity was 37.7%  
226 (Tegegne et al., 2022). Our study measured abdominal (central) obesity using two parameters;  
227 most studies reviewed had used WC.

228 Comparing overall overweight/obesity prevalence using BMI and abdominal/central obesity  
229 using WHtR and WC, WHtR yielded the highest prevalence of obesity, followed by WC, with  
230 BMI, recording the lowest. Our findings are consistent with those of a study in similar settings  
231 involving adults from informal settlements in Kenya which documented a much higher  
232 prevalence of abdominal obesity by WC of 52% compared to total obesity of 20% by BMI [23].  
233 BMI is a commonly used measure of obesity in low income settings despite its limitation in  
234 distinguishing between different body shapes/composition [24]. Previous studies among adults  
235 in urban Kenya[23] and urban Bissau in West Africa [25] have shown that individuals with  
236 normal weight may have an increased abdominal fat resulting in normal-weight central adiposity  
237 [23, 25] defined normal BMI (18.5 to 24.9 kg/m<sup>2</sup>) with abdominal obesity. Normal-weight  
238 central obesity is associated with higher risk of cardiovascular mortality compared to total  
239 obesity [26, 27]. Further studies to indicate the magnitude and role of normal-weight abdominal  
240 obesity in predicting cardiovascular risks in the current setting are recommended. Our findings  
241 also point to need to incorporate the other parameters in addition to BMI for detection and  
242 subsequent prevention and management of obesity.

243 Male participants had reduced odds of total obesity and abdominal obesity by both WC and  
244 WHtR compared to females in this study. These findings compare to those from a study with a  
245 nationally representative sample from Kenya that showed higher prevalence's of overall and  
246 abdominal obesity in females than males[10]. Similarly, the finding is consistent with that of  
247 other studies in Ethiopia[28, 29], Malawi [30] and South Africa[31] that reported increased risk  
248 of obesity among females. Previous studies have attempted to attribute this finding to the  
249 increased pregnancies[32] and multiparous [33] nature of most females in low income settings.  
250 In addition, most men tend to engage in physically demanding and manual occupations that  
251 prevent weight gain and reduces their risk of obesity [34, 35]. Body image and societal beauty

252 standards on females have pushed some females to desire to be heavier to feel more  
253 attractive[36]. A study in Ghana reported that 6% of females desired to be heavier, and tried to  
254 gain weight by consuming more calorie dense food[33]. Hormonal changes in females due to use  
255 of hormonal contraceptives also predispose them to obesity [37]. Moreover, postprandial  
256 lipemia, which reflects the body's metabolism of lipids, is reportedly more among females who  
257 use oral contraceptives[38], increasing their risk for obesity. These factors may have contributed  
258 the high rates of obesity among females in this study; however, future studies to assess the extent  
259 to which the factors contribute to obesity among low-income females in Kenya are needed.

260 This study found that increasing age was significantly associated with higher odds of total  
261 obesity, consistent with other studies in similar settings which have reported increased risk of  
262 obesity among older adults [11, 39, 40]. Ageing leads to body composition changes, increasing  
263 fat mass and decreasing muscle mass [41] and overall metabolism, that limit movement and  
264 activity, increasing risk of obesity.

265 This study found that higher monthly income was associated with increased odds of being obese.  
266 Similarly, studies conducted in Ethiopia revealed that respondents who were of a better  
267 economic status were more likely to be obese compared to those of low economic status [28, 42].  
268 The increased risk could be attributed to access to sugary and fatty diet together with a sedentary  
269 lifestyle among people with better social-economic status. However, previous studies have  
270 documented contradictory observations on the relationship between obesity and income in high  
271 and low income countries. Studies show that obesity increases with income in low income  
272 countries[43, 44] while in high-income countries social economic status is inversely associated  
273 with obesity [44, 45]. The mechanisms behind these differences is not well understood with  
274 studies suggesting that a combination of several factors to include social, cultural, psychological  
275 and biological factors play a role [43]. Further studies to investigate the causal relationship  
276 between income and obesity are needed.

277 Our study found smokers had reduced odds of total obesity (at bivariate) and abdominal obesity  
278 compared to non-smokers. The finding is consistent with studies done in Kenya [13],  
279 Malawi[30], Burkina Faso [46] and South-Africa [47], that showed negative associations  
280 between BMI and cigarette smoking. Similarly, previous studies showed current smokers had  
281 lower waist circumference compared to nonsmokers [48, 49]. Two possible mechanism through

282 which cigarette smoking can lead to reduced weight /adiposity include; the effect of nicotine,  
283 which increases energy expenditure in short-term and inhibit the expected compensatory increase  
284 in caloric intake, and cigarette smoking being a behavioral alternative to eating, resulting in  
285 decreased food intake [50, 51].

286 The strengths of the study are in the large community based sample and the use of more than one  
287 metric to estimate obesity in the same population. However, the study has some limitations  
288 because the data on behavioral factors were self-reported, collected retrospectively and thus  
289 liable to reporting, and recall bias. Similarly, the study utilized cross-sectional design and  
290 therefore a causal relationship between the outcome and predictor variables cannot be inferred.  
291 Nevertheless, we believe our estimates represent the epidemiology of abdominal and total  
292 obesity among the low-income adults in Kiambu County and provides basis for targeted  
293 interventions to address the high obesity among urban poor and future studies.

## 294 **Conclusion**

295 The prevalence of total obesity and abdominal obesity was high in the population.  
296 Obesity/overweight by BMI was associated with female gender, increasing age, monthly income,  
297 while abdominal obesity by WHtR/WC was associated with female gender, increasing age and  
298 cigarette smoking. Public health strategies focusing on weight reduction and maintenance  
299 strategies are urgently needed among low-income adults.

## 300 **Conflicts of interest**

301 The authors declare that they have no conflicts of interest.

## 302 **Funding statement**

303 This research was supported by the Consortium for Advanced Research Training in Africa  
304 (CARTA). CARTA is jointly led by the African Population and Health Research Center and the  
305 University of the Witwatersrand and funded by the Carnegie Corporation of New York (Grant  
306 No. G-19-57145), Sida (Grant No:54100113), Uppsala Monitoring Center, Norwegian Agency  
307 for Development Cooperation (Norad), and by the Wellcome Trust [reference no.  
308 107768/Z/15/Z] and the UK Foreign, Commonwealth & Development Office, with support from  
309 the Developing Excellence in Leadership, Training and Science in Africa (DELTA Africa)

310 programme. The statements made and views expressed are solely the responsibility of the  
311 authors.

## 312 **Acknowledgement**

313 Our special thanks go to the participants in this study for their invaluable contributions to this  
314 study. We thank the community health workers in Juja and Ruiru who conducted the data  
315 collection exercise. We also thank the Sub-county management teams and specifically the  
316 community strategy coordinators in the two sub-counties; Ms. Ann Wamaita Mwangi and Ms.  
317 Njoki Mwaura, as well as the Community health assistants in the participating wards for their  
318 immense support during the data collection exercise.

319

## 320 **References.**

- 321 1. Dai H, Alsalhe TA, Chalghaf N, Riccò M, Bragazzi NL, Wu J. The global burden of  
322 disease attributable to high body mass index in 195 countries and territories, 1990-2017: An  
323 analysis of the Global Burden of Disease Study. *PLoS medicine*. 2020;17(7):e1003198. Epub  
324 20200728. doi: 10.1371/journal.pmed.1003198. PubMed PMID: 32722671; PubMed Central  
325 PMCID: PMC7386577.
- 326 2. World Health Organization. Obesity and overweight Geneva2021 [cited 2023 28 May].  
327 Available from: <https://www.who.int/news-room/fact-sheets/detail/obesity-and-overweight>.
- 328 3. Shekar M, Popkin B. Obesity: health and economic consequences of an impending global  
329 challenge: World Bank Publications; 2020.
- 330 4. Ford ND, Patel SA, Narayan KV. Obesity in low-and middle-income countries: burden,  
331 drivers, and emerging challenges. *Annual review of public health*. 2017;38:145-64.
- 332 5. Powell-Wiley TM, Poirier P, Burke LE, Després J-P, Gordon-Larsen P, Lavie CJ, et al.  
333 Obesity and cardiovascular disease: a scientific statement from the American Heart Association.  
334 *Circulation*. 2021;143(21):e984-e1010.
- 335 6. Banjare J, Bhalerao S. Obesity associated noncommunicable disease burden.  
336 *International Journal of Health & Allied Sciences*. 2016;5(2):81-.
- 337 7. Koliaki C, Liatis S, Kokkinos A. Obesity and cardiovascular disease: revisiting an old  
338 relationship. *Metabolism*. 2019;92:98-107.
- 339 8. Yadav R, Aggarwal S, Singh A. SARS-CoV-2-host dynamics: Increased risk of adverse  
340 outcomes of COVID-19 in obesity. *Diabetes & Metabolic Syndrome: Clinical Research &*  
341 *Reviews*. 2020;14(5):1355-60.
- 342 9. Agyemang C, Boatemaa S, Frempong GA, de-Graft Aikins A. Obesity in sub-saharan  
343 Africa. Springer International Publishing Switzerland 2015; 2015.
- 344 10. Mkuu R, Barry A, Yonga G, Nafukho F, Wernz C, Gilreath T, et al. Prevalence and  
345 factors associated with overweight and obesity in Kenya. *Preventive medicine reports*.  
346 2021;22:101340.
- 347 11. Ondicho Z, Omondi D, Onyango A. Prevalence and socio-demographic factors  
348 associated with overweight and obesity among healthcare workers in Kisumu East Sub-County,  
349 Kenya. 2016.



- 350 12. Mkuu RS, Epnere K, Chowdhury MAB. Peer reviewed: prevalence and predictors of  
351 overweight and obesity among Kenyan women. *Preventing chronic disease*. 2018;15.
- 352 13. Pengpid S, Peltzer K. The prevalence and associated factors of underweight and  
353 overweight/obesity among adults in Kenya: Evidence from a national cross-sectional community  
354 survey. *Pan African Medical Journal*. 2020;36(1).
- 355 14. Ashwell M, Gunn P, Gibson S. Waist-to-height ratio is a better screening tool than  
356 waist circumference and BMI for adult cardiometabolic risk factors: systematic review and  
357 meta-analysis. *Obesity reviews*. 2012;13(3):275-86.
- 358 15. Yoo EG. Waist-to-height ratio as a screening tool for obesity and cardiometabolic risk.  
359 *Korean J Pediatr*. 2016;59(11):425-31. Epub 20161118. doi: 10.3345/kjp.2016.59.11.425.  
360 PubMed PMID: 27895689; PubMed Central PMCID: PMC5118501.
- 361 16. Lee CMY, Huxley RR, Wildman RP, Woodward M. Indices of abdominal obesity are  
362 better discriminators of cardiovascular risk factors than BMI: a meta-analysis. *Journal of Clinical  
363 Epidemiology*. 2008;61(7):646-53. doi: <https://doi.org/10.1016/j.jclinepi.2007.08.012>.
- 364 17. World Health Organization. Waist circumference and waist-hip ratio: report of a WHO  
365 expert consultation, Geneva, 8-11 December 2008. 2011.
- 366 18. Von Elm E, Altman DG, Egger M, Pocock SJ, Gøtzsche PC, Vandenbroucke JP. The  
367 Strengthening the Reporting of Observational Studies in Epidemiology (STROBE) statement:  
368 guidelines for reporting observational studies. *The Lancet*. 2007;370(9596):1453-7.
- 369 19. World Health Organization. Obesity: preventing and managing the global epidemic.  
370 2000.
- 371 20. Alberti G, Zimmet P, Shaw J, Grundy SM. The IDF consensus worldwide definition of  
372 the metabolic syndrome. Brussels: International Diabetes Federation. 2006;23(5):469-80.
- 373 21. Wahab KW, Sani MU, Yusuf BO, Gbadamosi M, Gbadamosi A, Yandutse MI.  
374 Prevalence and determinants of obesity-a cross-sectional study of an adult Northern Nigerian  
375 population. *International archives of medicine*. 2011;4(1):1-5.
- 376 22. Moges B, Amare B, Fantahun B, Kassu A. High prevalence of overweight, obesity, and  
377 hypertension with increased risk to cardiovascular disorders among adults in northwest Ethiopia:  
378 a cross sectional study. *BMC Cardiovascular Disorders*. 2014;14(1):155. doi: 10.1186/1471-  
379 2261-14-155.
- 380 23. Mohamed SF, Haregu TN, Khayeka-Wandabwa C, Muthuri SK, Kyobutungi C.  
381 Magnitude and predictors of normal-weight central obesity- the AWI-Gen study findings. *Global  
382 health action*. 2019;12(1):1685809. doi: 10.1080/16549716.2019.1685809. PubMed PMID:  
383 31694493; PubMed Central PMCID: PMC6844381.
- 384 24. Frankenfield DC, Rowe WA, Cooney RN, Smith JS, Becker D. Limits of body mass  
385 index to detect obesity and predict body composition. *Nutrition*. 2001;17(1):26-30.
- 386 25. Turé R, Damasceno A, Djicó M, Lunet N. Prevalence of Underweight, Overweight and  
387 Obesity among Adults in Urban Bissau, Western Africa. *Nutrients*. 2021;13(12). Epub  
388 20211123. doi: 10.3390/nu13124199. PubMed PMID: 34959751; PubMed Central PMCID:  
389 PMC68707413.
- 390 26. Sahakyan KR, Somers VK, Rodriguez-Escudero JP, Hodge DO, Carter RE, Sochor O, et  
391 al. Normal-Weight Central Obesity: Implications for Total and Cardiovascular Mortality. *Annals  
392 of internal medicine*. 2015;163(11):827-35. Epub 20151110. doi: 10.7326/m14-2525. PubMed  
393 PMID: 26551006; PubMed Central PMCID: PMC4995595.
- 394 27. Coutinho T, Goel K, Corrêa de Sá D, Carter RE, Hodge DO, Kragelund C, et al.  
395 Combining body mass index with measures of central obesity in the assessment of mortality in

- 396 subjects with coronary disease: role of “normal weight central obesity”. *Journal of the American*  
397 *College of Cardiology*. 2013;61(5):553-60.
- 398 28. Tegegne KD, Wagaw GB, Gebeyehu NA, Yirdaw LT, Shewangashaw NE, Mekonen  
399 NA, et al. Prevalence of central obesity and associated factors in Ethiopia: A systematic review  
400 and meta-analysis. *Frontiers in Endocrinology*. 2022;13. doi: 10.3389/fendo.2022.983180.
- 401 29. Molla MD, Wolde HF, Atnafu A. Magnitude of Central Obesity and its Associated  
402 Factors Among Adults in Urban Areas of Northwest Ethiopia. *Diabetes Metab Syndr Obes*.  
403 2020;13:4169-78. Epub 20201106. doi: 10.2147/dms0.S279837. PubMed PMID: 33192079;  
404 PubMed Central PMCID: PMCPMC7654528.
- 405 30. Msyamboza KP, Kathyola D, Dzowela T. Anthropometric measurements and prevalence  
406 of underweight, overweight and obesity in adult Malawians: nationwide population based NCD  
407 STEPS survey. *Pan African Medical Journal*. 2013;15(1).
- 408 31. Case A, Menendez A. Sex differences in obesity rates in poor countries: Evidence from  
409 South Africa. *Economics & Human Biology*. 2009;7(3):271-82. doi:  
410 <https://doi.org/10.1016/j.ehb.2009.07.002>.
- 411 32. Chigbu C, Aja L. Obesity in pregnancy in southeast Nigeria. *Annals of medical and*  
412 *health sciences research*. 2011;1(2):135-40.
- 413 33. Benkeser R, Biritwum R, Hill A. Prevalence of overweight and obesity and perception of  
414 healthy and desirable body size in urban, Ghanaian women. *Ghana medical journal*.  
415 2012;46(2):66-75.
- 416 34. Pujilestari CU, Nyström L, Norberg M, Weinehall L, Hakimi M, Ng N. Socioeconomic  
417 inequality in abdominal obesity among older people in Purworejo District, Central Java,  
418 Indonesia – a decomposition analysis approach. *International Journal for Equity in Health*.  
419 2017;16(1):214. doi: 10.1186/s12939-017-0708-6.
- 420 35. Wardle J, Waller J, Jarvis MJ. Sex differences in the association of socioeconomic status  
421 with obesity. *American journal of public health*. 2002;92(8):1299-304.
- 422 36. Pradeilles R, Holdsworth M, Olaitan O, Irache A, Osei-Kwasi HA, Ngandu CB, et al.  
423 Body size preferences for women and adolescent girls living in Africa: a mixed-methods  
424 systematic review. *Public health nutrition*. 2022;25(3):738-59.
- 425 37. Mangemba NT, San Sebastian M. Societal risk factors for overweight and obesity in  
426 women in Zimbabwe: a cross-sectional study. *BMC public health*. 2020;20(1):1-8.
- 427 38. Petto J, Vasques LMR, Pinheiro RL, Giesta BdA, Santos ACNd, Gomes Neto M, et al.  
428 Comparison of Postprandial Lipemia between Women who  
429 are on Oral Contraceptive Methods and Those who are not. *Arquivos Brasileiros de*  
430 *Cardiologia*. 2014;103.
- 431 39. Chibuike Ogwuegbu C, Klaus GP, Uzochukwu UA, Ursula B. Prevalence and  
432 sociodemographic determinants of adult obesity: a large representative household survey in a  
433 resource-constrained African setting with double burden of undernutrition and overnutrition.  
434 *Journal of Epidemiology and Community Health*. 2018;72(8):702. doi: 10.1136/jech-2018-  
435 210573.
- 436 40. Ajayi IO, Adebamowo C, Adami H-O, Dalal S, Diamond MB, Bajunirwe F, et al. Urban–  
437 rural and geographic differences in overweight and obesity in four sub-Saharan African adult  
438 populations: a multi-country cross-sectional study. *BMC Public Health*. 2016;16(1):1126. doi:  
439 10.1186/s12889-016-3789-z.
- 440 41. Sakuma K, Yamaguchi A. Sarcopenic obesity and endocrinal adaptation with age.  
441 *International journal of endocrinology*. 2013;2013.

- 442 42. Tekalegn Y, Solomon D, Sahiledengle B, Assefa T, Negash W, Tahir A, et al. Prevalence  
443 of central obesity and its associated risk factors among adults in Southeast Ethiopia: A  
444 community-based cross-sectional study. *PLoS one*. 2022;17(8):e0265107.
- 445 43. Ameye H, Swinnen J. Obesity, income and gender: the changing global relationship.  
446 *Global Food Security*. 2019;23:267-81.
- 447 44. Dinsa GD, Goryakin Y, Fumagalli E, Suhrcke M. Obesity and socioeconomic status in  
448 developing countries: a systematic review. *Obesity reviews*. 2012;13(11):1067-79.
- 449 45. Kim TJ, von dem Knesebeck O. Income and obesity: what is the direction of the  
450 relationship? A systematic review and meta-analysis. *BMJ open*. 2018;8(1):e019862.
- 451 46. Kaboré S, Millogo T, Soubeiga JK, Lanou H, Bicaba B, Kouanda S. Prevalence and risk  
452 factors for overweight and obesity: a cross-sectional countrywide study in Burkina Faso. *BMJ*  
453 *Open*. 2020;10(11):e032953. doi: 10.1136/bmjopen-2019-032953.
- 454 47. Nglazi MD, Ataguba JE-O. Overweight and obesity in non-pregnant women of  
455 childbearing age in South Africa: subgroup regression analyses of survey data from 1998 to  
456 2017. *BMC public health*. 2022;22(1):395. doi: 10.1186/s12889-022-12601-6.
- 457 48. Clair C, Chiolero A, Faeh D, Cornuz J, Marques-Vidal P, Paccaud F, et al. Dose-  
458 dependent positive association between cigarette smoking, abdominal obesity and body fat:  
459 cross-sectional data from a population-based survey. *BMC public health*. 2011;11:1-10.
- 460 49. Matsushita Y, Nakagawa T, Yamamoto S, Takahashi Y, Noda M, Mizoue T.  
461 Associations of smoking cessation with visceral fat area and prevalence of metabolic syndrome  
462 in men: the Hitachi health study. *Obesity*. 2011;19(3):647-51.
- 463 50. Audrain-McGovern J, Benowitz N. Cigarette smoking, nicotine, and body weight.  
464 *Clinical Pharmacology & Therapeutics*. 2011;90(1):164-8.
- 465 51. Chiolero A, Faeh D, Paccaud F, Cornuz J. Consequences of smoking for body weight,  
466 body fat distribution, and insulin resistance<sup>1</sup>. *The American Journal of Clinical Nutrition*.  
467 2008;87(4):801-9. doi: <https://doi.org/10.1093/ajcn/87.4.801>.
